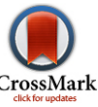

# A *Yersinia pestis* *tat* Mutant Is Attenuated in Bubonic and Small-Aerosol Pneumonic Challenge Models of Infection but Not As Attenuated by Intranasal Challenge

Joel Bozue<sup>1\*</sup>, Christopher K. Cote<sup>1</sup>, Taylor Chance<sup>2</sup>, Jeffrey Kugelman<sup>3</sup>, Steven J. Kern<sup>4</sup>, Todd K. Kijek<sup>1</sup>, Amy Jenkins<sup>1</sup>, Sherry Mou<sup>1</sup>, Krishna Moody<sup>1</sup>, David Fritz<sup>1</sup>, Camenzind G. Robinson<sup>2</sup>, Todd Bell<sup>2</sup>, Patricia Worsham<sup>1</sup>

**1** Bacteriology Division, The United States Army of Medical Research Institute of Infectious Diseases, Fort Detrick, Maryland, United States of America, **2** Pathology Division, The United States Army of Medical Research Institute of Infectious Diseases, Fort Detrick, Maryland, United States of America, **3** Center for Genome Sciences, The United States Army of Medical Research Institute of Infectious Diseases, Fort Detrick, Maryland, United States of America, **4** Office of Research Support, The United States Army of Medical Research Institute of Infectious Diseases, Fort Detrick, Maryland, United States of America

## Abstract

Bacterial proteins destined for the Tat pathway are folded before crossing the inner membrane and are typically identified by an N-terminal signal peptide containing a twin arginine motif. Translocation by the Tat pathway is dependent on the products of genes which encode proteins possessing the binding site of the signal peptide and mediating the actual translocation event. In the fully virulent CO92 strain of *Yersinia pestis*, the *tatA* gene was deleted. The mutant was assayed for loss of virulence through various *in vitro* and *in vivo* assays. Deletion of the *tatA* gene resulted in several consequences for the mutant as compared to wild-type. Cell morphology of the mutant bacteria was altered and demonstrated a more elongated form. In addition, while cultures of the mutant strain were able to produce a biofilm, we observed a loss of adhesion of the mutant biofilm structure compared to the biofilm produced by the wild-type strain. Immuno-electron microscopy revealed a partial disruption of the F1 antigen on the surface of the mutant. The virulence of the  $\Delta$ *tatA* mutant was assessed in various murine models of plague. The mutant was severely attenuated in the bubonic model with full virulence restored by complementation with the native gene. After small-particle aerosol challenge in a pneumonic model of infection, the mutant was also shown to be attenuated. In contrast, when mice were challenged intranasally with the mutant, very little difference in the LD<sub>50</sub> was observed between wild-type and mutant strains. However, an increased time-to-death and delay in bacterial dissemination was observed in mice infected with the  $\Delta$ *tatA* mutant as compared to the parent strain. Collectively, these findings demonstrate an essential role for the Tat pathway in the virulence of *Y. pestis* in bubonic and small-aerosol pneumonic infection but less important role for intranasal challenge.

**Citation:** Bozue J, Cote CK, Chance T, Kugelman J, Kern SJ, et al. (2014) A *Yersinia pestis* *tat* Mutant Is Attenuated in Bubonic and Small-Aerosol Pneumonic Challenge Models of Infection but Not As Attenuated by Intranasal Challenge. PLoS ONE 9(8): e104524. doi:10.1371/journal.pone.0104524

**Editor:** Mikael Skurnik, University of Helsinki, Finland

**Received:** February 6, 2014; **Accepted:** July 11, 2014; **Published:** August 7, 2014

This is an open-access article, free of all copyright, and may be freely reproduced, distributed, transmitted, modified, built upon, or otherwise used by anyone for any lawful purpose. The work is made available under the Creative Commons CC0 public domain dedication.

**Funding:** The research described herein was sponsored by the Defense Threat Reduction Agency JSTO-CBD (project number 923698). The funders had no role in study design, data collection and analysis, decision to publish, or preparation of the manuscript.

**Competing Interests:** The authors have declared that no competing interests exist.

\* Email: joela.bozue@us.army.mil

## Introduction

*Yersinia pestis* is the causative agent of plague and primarily a disease of rodents, transmitted typically by fleas. Clinical forms of the disease in humans are bubonic, septicemic, and pneumonic. Humans most often become infected by fleabites which manifests in the bubonic form of plague and is characterized by painful local lymphadenopathy, referred to as a bubo. Infection of the lymph node may disseminate throughout the body leading to septicemic plague. *Y. pestis* may also reach the lungs and lead to the pneumonic form of plague which could be spread human-to-human by the respiratory route. Pneumonic plague is the most severe and frequently fatal form of the disease [1,2].

Similar to other bacteria, *Yersinia* species have several mechanisms for the transport and secretion of proteins. The most studied of these mechanisms is the type III secretion system which delivers *Yersinia* outer proteins (Yops) into host cells [3–5]. The

general method bacteria, including *Yersinia*, use for secretion is the Sec system which transports proteins across the cytoplasmic membrane in an unfolded state [6]. In contrast to the Sec system, twin arginine translocation (Tat) system delivers folded proteins into the periplasm, using the proton motive force at the membrane [7]. Proteins to be translocated by the Tat system typically have a consensus signal sequence containing twin arginines at the N-terminal signal peptide. The genes encoding the Tat system include *tatA*, *tatB*, *tatC*, and *tatD* which may or may not be associated in an operon, depending on the bacterium. The TatB and TatC proteins possess the primary binding site of the signal peptide of the protein directed for translocation [8–10]; whereas TatA mediates the actual translocation event [11,12]. Recent evidence also suggests that TatE may also play some role in the transport of Tat substrates [13]. Interestingly, the TatD protein is located within the cytoplasm and possesses DNase activity but is not required for Tat translocation of proteins [14].

The Tat system has been shown to be important for virulence in both animal and plant pathogens [15–25], including *Yersinia pseudotuberculosis* [26]. Therefore, the Tat system represents a potential therapeutic target for a wide range of bacterial pathogens. To determine what role this translocation system may play in virulence in *Y. pestis*, we deleted the *tatA* gene from the chromosome of the fully virulent CO92 strain [27] and found several dramatic phenotypic effects.

## Materials and Methods

### Bacterial strains and medium

The *Escherichia coli* and *Y. pestis* strains and plasmids used in this study are listed in Table 1. All *E. coli* strains were grown at 37°C on Luria-Bertani (LB) plates or in LB broth, and when needed, ampicillin was included at 50 µg/mL. For routine growth, the CO92 strain of *Y. pestis* was maintained on sheep blood agar plates or in heart infusion (HI) broth at 28°C. When grown at 37°C, medium was supplemented with either 2.5 mM CaCl<sub>2</sub> or 20 mM MgCl<sub>2</sub> and 20 mM sodium oxalate (MOX), as indicated. Selection of *Y. pestis* cointegrants or mutant strains occurred on LB Lennox agar (L2897; Sigma-Aldrich; Saint Louis, MO) plates supplemented with ampicillin (50 µg/mL) or 5% sucrose, as needed. To verify that the mutant retained the *pgm* locus, *Y. pestis* strains were screened on Congo Red agar plates [28]. To confirm that the bacteria isolated following animal challenges was *Y. pestis*, bacteria were screened on *Yersinia* selective agar plates which contains cefsulodin, irgasan, and novobiocin (R01988; Remel, Inc; Lenexa, KS).

USAMRIID is compliant with all federal and Department of Defense regulations pertaining to the use of Select Agents.

### Growth assays

Growth assays were performed in HI broth at 28°C or 37°C with either CaCl<sub>2</sub> or MOX, as indicated. Assays were performed using an Infinite M200 pro (Tecan; Männedorf, Switzerland)

microplate reader in 96-well microtiter plates. The OD<sub>600</sub> was measured every 60 min. For all assays, the bacterial strains were grown overnight at 28°C in HI broth and resuspended in fresh HI broth (alone or with CaCl<sub>2</sub> or MOX as indicated) at an OD<sub>600</sub> of ~0.1. The resuspended cultures were diluted 1:1 into the respective HI broth. For the assays performed at 37°C, the cultures were initially incubated at 28°C for 1 h for strain acclimation and then increased to 37°C. All samples were performed in quadruplicate and included medium controls to confirm sterility and for use as blanks to calculate the absorbance of the cultures. Additional well samples were included to monitor the increase of CFUs over the course of the growth study.

### Mutant construction

A fragment of DNA containing the *tatA* gene was PCR amplified (Table 2) using Phusion Taq polymerase (New England Biolabs, Inc.; Ipswich, MA) from genomic DNA from the CO92 strain of *Y. pestis*. The PCR product was ligated into pJET1.2 (Fermentas, Inc.; Glen Burnie, Maryland). The *tatA* gene was removed from the plasmid in-frame through inverse PCR (Table 2) while retaining the first and last three nucleotides of the gene. The *Y. pestis* DNA containing the deleted *tatA* gene was excised as an EcoRI fragment and cloned into pWSK30 [29]. The insert was then sub-cloned as a SacI-SalI fragment into vector pCDV422 [30].

Construction of the *Y. pestis*  $\Delta$ *tatA* mutant was performed by the procedure as previously described [5,31]. Briefly, the pCDV422+ $\Delta$ *tatA* plasmid was introduced by electroporation into electrocompetent *Y. pestis* [32]. Cointegrates were selected on LB agar plates containing ampicillin. The cointegrate strain was grown overnight in HI broth and plated on LB agar plates containing 5% sucrose to select for allelic exchange recombinants. Deletion mutants of  $\Delta$ *tatA* were identified by PCR (Table 2). The presence of the *Y. pestis* virulence plasmids was confirmed via PCR (Table 2). The  $\Delta$ *tatA* mutant strain was next passaged through Swiss Webster mice by subcutaneous challenge, as routinely

**Table 1.** Strains and Plasmids.

|                                            | Relevant Characteristics                                               | Reference/Source    |
|--------------------------------------------|------------------------------------------------------------------------|---------------------|
| <i>E. coli</i> strains                     |                                                                        |                     |
| DH5 $\alpha$                               |                                                                        | NEB                 |
| TransformMax EC100D                        | <i>pir</i> -116                                                        | EPICENTRE           |
| <i>Y. pestis</i> CO92 strains              |                                                                        |                     |
| wild-type                                  | fully virulent                                                         | [27]                |
| $\Delta$ <i>tatA</i>                       | <i>tatA</i> in-frame deletion mutant                                   | this study          |
| $\Delta$ <i>tatA</i> /pJET1.2+ <i>tatA</i> | complemented $\Delta$ <i>tatA</i> mutant                               | this study          |
| CO92-C12                                   | F1 antigen negative strain                                             | [57]                |
| CO92 pLcr <sup>-</sup>                     | pLcr negative strain                                                   | USAMRIID collection |
| Plasmid                                    |                                                                        |                     |
| pJET1.2                                    | PCR cloning vector                                                     | Fermentas, Inc      |
| pJET1.2+ <i>tatA</i>                       | contains DNA fragment of <i>tatA</i> gene and flanking sequence        | this study          |
| pJET1.2+ $\Delta$ <i>tatA</i>              | deletion of <i>tatA</i> from DNA fragment                              | this study          |
| pWSK30                                     | low copy <i>E. coli</i> vector for cloning                             | [29]                |
| pWSK30+ $\Delta$ <i>tatA</i>               | deletion of <i>tatA</i> from DNA fragment                              | this study          |
| pCDV422                                    | suicide vector containing Amp <sup>R</sup> and <i>sacB</i>             | [30]                |
| pCDV422+ $\Delta$ <i>tatA</i>              | vector to introduce in-frame deletion of <i>tatA</i> from DNA fragment | this study          |

doi:10.1371/journal.pone.0104524.t001

**Table 2.** Primers.

| <b>Cloning <i>tatA</i></b>  |                                 |
|-----------------------------|---------------------------------|
| tatA 5':                    | CCGCTCGAGACGCTGTCCCTGCCTCAAGTA  |
| tatA 3':                    | CGGGATCCCGCGCCGTTTTAATATGGAAGTA |
| <b>Deleting <i>tatA</i></b> |                                 |
| tatA inverse 5':            | GCTGTGTTTCGATATCGGGTTTA         |
| tatA inverse 3':            | CATATTACCTACCTCTATTATA          |
| <b>Screening for mutant</b> |                                 |
| tatA upstream:              | TACACCCGCCCAACACAAGAGA          |
| tatA downstream:            | CGCGCCGTTTTAATATGGAAGTA         |
| <b>Screening for pCD1</b>   |                                 |
| lcrV-1:                     | AGGGTGGAACAACCTTACTG            |
| lcrV-2:                     | GTGCCACTACTAGACAGATGC           |
| <b>Screening for pMT</b>    |                                 |
| Ymt-5'                      | TTTCGGCCAATCTCCAACAGTA          |
| Ymt-3'                      | TCCGACCGCCCATCA                 |
| CapAG-5'                    | AAAAATCAGTCCGTTATCG             |
| CapAG-3'                    | CTGCCCGTAGCCAAGAC               |
| <b>Screening for pPst</b>   |                                 |
| Pla-5'                      | TGGCTCCGGGTCAGGTA               |
| Pla-3'                      | AGCCGGATGTCTTCTCACG             |

doi:10.1371/journal.pone.0104524.t002

practiced by many labs [31,33,34], in order to ensure the genetic stability of the mutant strain after numerous *in vitro* growth steps needed to construct the mutant strain. The *Y. pestis* genome is unstable due to the presence of numerous *IS100* elements [35–37], and the passage of the mutant through an animal decreases the likelihood of a mixed population [2]. Animal passaged isolates of the  $\Delta$ *tatA* mutant strain were harvested from the spleens of moribund mice following euthanasia.

To demonstrate phenotypes observed for the  $\Delta$ *tatA* mutant were due specifically to the deletion of the gene, the mutant strain was complemented with an intact functional *tatA* gene present on pJET1.2 *in trans* via electroporation as described above.

## Microscopy

**Light microscopy.** *Y. pestis* strains were grown as indicated and fixed in 4% formaldehyde. The samples were then stained with Wayson stain [38] and observed with an Eclipse E800 fluorescence microscope (Nikon, Inc.; Melville, NY). Images were captured using a Microfire camera and Pictureframe software (Optronics; Goleta, California). Fluorescence microscopy. *Y. pestis* was grown at 37°C in HI broth in the presence of CaCl<sub>2</sub> and fixed as described above. The presence of F1 antigen on *Y. pestis* was determined by indirect fluorescence microscopy (IFM) using the mouse monoclonal antibody (mAb) F1-04-A-G1 [39]. Samples were spun onto slides using a Cyto-Spin centrifuge (Thermo Shandon; Pittsburgh, PA), blocked with 7% skim milk in PBS for 30 min, exposed to the primary antibody (1:5,000) in the presence of skim milk in PBS containing 0.1% Tween-20 (PBST) for 1 h, washed three times with PBST, incubated with a secondary antibody (goat-anti mouse antibody conjugated with Texas Red) in the presence of 7% skim milk in PBST for 1 h, washed again, and then observed as described above.

**Electron microscopy.** Standard methods for transmission electron microscopy (TEM) were employed. *Y. pestis* samples were

fixed with 1% glutaraldehyde and 4% formaldehyde in 0.1 M phosphate buffer for several days and sterility was confirmed. Post fixation was performed for 1 h at room temperature in phosphate buffer containing 1% osmium tetroxide and contrasted in ethanolic uranyl acetate before dehydration in a graded series of ethanol rinses and propylene oxide. The samples were embedded into EMBED-812 embedding medium (Electron Microscopy Sciences; Hatfield, PA) overnight at room temperature and the samples were then sectioned into 90-nm sections. These sections were counterstained with uranyl and lead salts. For immuno-EM (IEM) analysis, samples were fixed in 0.1% glutaraldehyde and 4% paraformaldehyde in 0.1 M phosphate buffer for several days and sterility confirmed. Samples were dehydrated using graded ethanol, embedded in LR White resin (Polysciences Inc., Warrington, PA), and heat cured. Sections were cut as described above, blocked, exposed to primary antibody to F1 at a 1:100 dilution, washed, and then incubated with the secondary antibody conjugated with 10 nm gold particles. Sections were counterstained with uranyl and lead salts. All EM samples were examined using a JEOL 1011 transmission electron microscope.

## Biofilm assay

*Y. pestis* strains were tested for biofilm formation and adherence. The methods followed were previously described [40], except that bacteria were grown in HI broth for 24 h and then diluted in 40% HI broth for biofilm measurements in 24-well polystyrene dishes. The bacteria were grown at 200 rpm for approximately 18 h at 26°C. The biofilm was stained with 0.01% crystal violet. The wells were washed three times and bound dye was solubilized with 80% ethanol-20% acetone. The crystal violet was assayed by absorbance. The standard deviation was derived from quadruplicate samples. These data represent three separate experiments.

## Protein extraction and analysis

Both whole-cell extracts and supernatants were collected for protein analysis from *Y. pestis* strains grown in HI broth at 28°C or at 37°C (with CaCl<sub>2</sub> or MOX, as indicated) as previously described [5]. Briefly, whole-cell extracts from *Y. pestis* were obtained from collecting bacteria from 18 h grown cultures. The cultures were centrifuged, the supernatant fluids collected, and the pellets resuspended in 1 ml of ice-cold water. The cultures were pelleted, suspended in water with MPBio Lysing Matrix B (MP Biomedicals; Solon, OH), bead beat for 40 s with a FastPrep FP120 Cell Disrupter (MP Biomedicals), chilled on ice, bead beat again for 40 s, microfuged for 5 min, and then passed through a 0.2 micron filter. The preparation was then sterility checked by plating a portion of the sample on sheep blood agar plates. The *Y. pestis* supernatants were concentrated by passage through a centrifugal filter device (Amicon Ultra-10K, Millipore; Billerica, MA), heat fixed (95°C for 30 min), and sterility checked. The protein concentrations from all samples were determined using the BCA Protein Assay kit (Pierce; Rockford, IL) per the manufacturer's recommendations. Equal protein concentrations of samples were run on 10% Bis-Tris gels (Invitrogen; Carsland, CA) and stained using the Gel Code Blue kit (Pierce).

For Western analysis, fractionated proteins were transferred onto a PVDF membrane overnight at 4°C in 1× NuPAGE transfer buffer (Invitrogen), 0.35% SDS, and 20% methanol. After transfer, the membranes were blocked with 10% skim milk in PBS containing 0.1% Tween-20. Mouse monoclonal antibodies [anti-F1, anti-GroEL (Enzo-Life Sciences, Plymouth Meeting, PA), or anti-LcrV [41]] were used at a dilution of 1:5,000 and secondary rabbit anti-mouse horseradish peroxidase was used at a dilution of 1:5,000. Bands were visualized using 4-chloronaphthol/3,3'-diaminobenzidine (Pierce). To demonstrate that the bands were the expected respective proteins, recombinant F1, GroEL, or LcrV were also run on the gels for control purposes.

## Animal challenges

To determine the LD<sub>50</sub> values for the wild-type and *ΔtatA* mutant, at least 5 groups of 10 naïve female 6–8-week-old Swiss Webster mice were challenged by the various routes. For all methods of infection, the challenge doses were determined by serial dilutions and plating. Subcutaneous challenge (sub-Q). Frozen *Y. pestis* stocks were streaked onto tryptose blood agar base (Difco Laboratories, Detroit, MI) slants and incubated at 28°C for 2 days. Bacterial cells were harvested from the slants in 10 mM KPBS (potassium phosphate buffered solution), and mice were challenged with 0.2 ml aliquots at various cell concentrations. Aerosol challenge. For aerosol challenges, a suspension of *Y. pestis* prepared from a slant suspension was used to inoculate flasks containing 100 ml of HI broth at an approximate OD<sub>600</sub> of 0.01. The broth cultures were grown for 24 h in a 30°C shaker at 100 rpm, centrifuged, washed twice with HI broth, adjusted for various challenge doses. Mice were exposed to *Y. pestis* using a dynamic 30-liter humidity-controlled Plexiglas whole-body exposure chamber, as previously described [42]. The calculated inhaled doses were obtained as previously described [42,43]. Intranasal challenge. Mice were anesthetized with 150 μl of ketamine, acepromazine, and xylazine injected intramuscularly. The mice were then challenged by intranasal instillation with 50 μl of *Y. pestis* suspended in KPBS from slant grown cultures as described above. For all challenge experiments, mice were monitored several times each day and mortality rates (or euthanasia when moribund) were recorded. *In vivo* dissemination experiments. For *Y. pestis* dissemination studies after intranasal challenge, approximately equal numbers of either the parental (113,000 CFU) or *ΔtatA*

mutant (76,000 CFU) strains were used to challenge mice as described above. At specified time points after challenge, mice (n = 4–5) were then humanely euthanized within a CO<sub>2</sub> chamber. The lungs and spleens were harvested, rinsed with KPBS, weighed, and then homogenized in 1 ml of KPBS in a tissue grinder (Kendall Healthcare Precision Disposable Tissue Grinder Systems, Covidien; Mansfield, MA). The homogenates were then serially diluted and plated on to sheep blood agar plates.

Challenged mice were observed at least twice daily for 21 days for clinical signs of illness. Humane endpoints were used during all studies, and mice were humanely euthanized when moribund according to an endpoint score sheet. Animals were scored on a scale of 0–12: 0–3 = no clinical signs; 4–7 = clinical symptoms; increase monitoring; 8–12 = distress; euthanize. Those animals receiving a score of 8–12 were humanely euthanized by CO<sub>2</sub> exposure using compressed CO<sub>2</sub> gas followed by cervical dislocation. However, even with multiple checks per day, some animals died as a direct result of the infection.

Animal research at The United States Army of Medical Research Institute of Infectious Diseases was conducted and approved under an Institutional Animal Care and Use Committee in compliance with the Animal Welfare Act, PHS Policy, and other Federal statutes and regulations relating to animals and experiments involving animals. The facility where this research was conducted is accredited by the Association for Assessment and Accreditation of Laboratory Animal Care, International and adheres to principles stated in the Guide for the Care and Use of Laboratory Animals, National Research Council, 2011.

## Pathology

Postmortem tissues were collected from mice challenged with *Y. pestis*, fixed in 10% neutral buffered formalin, routinely processed, embedded in paraffin, and sectioned for hematoxylin and eosin (HE) staining as previously described [44]. Immunohistochemistry was performed on sections using a primary antibody to the F1 antigen and secondary antibody, a peroxidase-labeled polymer, EnVision Peroxidase kit (Dako Corp., Carpinteria, CA). The slides were stained with substrate-chromogen solution and counter stained with hematoxylin.

## Statistics

For comparing data from the biofilm experiments and TTD studies of mouse challenges, statistical significance ( $P < 0.05$ ) was determined by the two-tailed Student *t* test. LD<sub>50</sub> analysis was determined by the Bayesian probit analysis. Survival rates were compared between groups by Fisher exact tests with permutation adjustment for multiple comparisons using SAS Version 8.2 (SAS Institute Inc., SAS OnlineDoc, Version 8, Cary, N.C. 2000).

## Screening the *Y. pestis* genome for Tat motifs

To scan for additional Tat-like motifs, we developed a script that allows more flexibility at each position in the motif with amino acids in the same basic grouping: non-polar, polar, acidic and basic. For positions with validated variants from multiple groups, we allowed substitution to either group. The script does not calculate total similarity distance from the original sequence allowing for multiple changes in order to give us the most flexibility possible within each grouping at each position. The resulting hits largely agree with the Hidden Markov Model results for the Tat signal motif available at Pfam (PF10518). Model data available at [pfam.sanger.ac.uk/family/PF10518/hmm](http://pfam.sanger.ac.uk/family/PF10518/hmm).

## Results

### Construction of the $\Delta$ *tatA* mutant

In *Y. pestis*, the *tatABCD* genes are clustered very closely together on the chromosome [45]. The *tatA* gene (267 bp) is 4 bp downstream of *tatB* (663 bps). Three bp downstream of *tatB* is the *tatC* gene (777 bp). The *tatD* gene is 540 bp in length and is 14 bp downstream of *tatC*. The *tatA* gene was deleted in-frame from the chromosome of the fully virulent CO92 strain of *Y. pestis*, as described above in the Materials and Methods section. Deletion mutants were screened by PCR using primers outside of the *tatA* cloning region (Table 2). For those clones which reverted back to the wild-type strain, a PCR fragment of 2.1 kb was observed. However, for those mutants deleted of the *tatA* gene, a shift of approximately 250 bp was observed (data not shown).

### Growth of the $\Delta$ *tatA* mutant in culture medium is not altered but cell morphology is

Growth curves were performed comparing the wild-type and  $\Delta$ *tatA* mutant in HI broth (28°C, 37°C with CaCl<sub>2</sub>, and 37°C with MOX) by both optical density (OD<sub>600</sub>) and CFU counts (Fig. 1). No differences in growth rates were observed between strains as observed by OD (Fig. 1). However, CFU counts at all-time points (even for the starting inoculum at Time 0), were consistently lower in the mutant strain compared to the wild-type strain despite having similar OD measurements. However, the increase in CFU counts of both parent and mutant strains over the time course was still similar.

To determine why the CFU counts between the two strains were different; cells were examined by light microscopy. The mutant displayed an abnormal morphological phenotype at both 28°C (data not shown) and 37°C with CaCl<sub>2</sub> (Fig. 2). The  $\Delta$ *tatA* bacteria lost the typical *Yersinia* coccobacillus shape and became more elongated to a pronounced bacillus form, as compared to the wild-type strain (Fig. 2A and B). To further characterize the structural differences of the  $\Delta$ *tatA* mutant strain, TEM was performed with the parental and mutant strains grown at 37°C with CaCl<sub>2</sub> (Fig. 2C and D). Again for the  $\Delta$ *tatA* mutant, the bacteria displayed an elongated bacillus form. In addition, many of the bacteria appeared to be inhibited in separating from one another during cellular division. This phenomenon is discussed further below; however, our morphological results are in general agreement with *tat* mutations in other bacteria [25,46,47].

### The integrity of biofilm in the $\Delta$ *tatA* mutant is affected

In addition to the structural differences observed with the  $\Delta$ *tatA* strain, the mutant also demonstrated a defect in biofilm integrity. After overnight growth at 26°C, a bacterial biofilm formed for both the *Y. pestis* wild-type (Fig. 3A) and mutant (Fig. 3B) cultures at the liquid/air interface. The biofilm, however, of the  $\Delta$ *tatA* cultures was easily dislodged as compared to the wild-type strain.

To quantitate the adherence defect of the  $\Delta$ *tatA* mutant, it was assayed as previously described [40]. As shown in Fig. 3C, the quantity of biofilm detected between wild-type *Y. pestis* and the  $\Delta$ *tatA* mutant differed significantly ( $P < 0.0001$ ). As described above, the  $\Delta$ *tatA* bacteria were still able to produce biofilm; however, there was a defect in the adherence or integrity of the biofilm to bind to the substrate. In this assay, the biofilm was dislodged during the wash steps and prior to the absorbance readings. To demonstrate this adherence defect was due specifically to the deletion of *tatA*, the mutant was complemented with a functional *tatA* gene. As shown in Fig. 3C, the quantity of measured adherent biofilm for the complemented mutant strain and wild-type CO92 did not differ significantly ( $P = 0.09$ ).

Therefore, providing a functional *tatA* gene was able to restore the adherence/integrity defect of the  $\Delta$ *tatA* mutant strain.

### The $\Delta$ *tatA* mutant is altered in F1 antigen localization

As the deletion of the *tatA* gene would affect translocated proteins, we examined proteins extracted from both the cell pellet and supernatant fractions of mutant and wild-type bacteria grown in HI broth at 28°C or 37°C containing CaCl<sub>2</sub>. As shown in Fig. 4A, the proteins collected from pellets of *Y. pestis* grown at 28°C were separated on a 10% Bis-Tris gels, but no obvious differences were observed in the protein profile between wild-type,  $\Delta$ *tatA*, or C12 (F1 antigen/*cafI* mutant) strains. However, when the protein pellets were examined from *Y. pestis* grown at 37°C under high calcium conditions, an intense band at <19 kDa appeared for wild-type CO92 which was not present for the 28°C samples. For proteins extracted for the  $\Delta$ *tatA* pellet, this band was also present but not as intense as observed for the wild-type strain. We presumed that this band corresponded to the F1 antigen protein encoded by the *cafI* gene which is expressed by *Y. pestis* at 37°C and has a molecular mass of 15.5 kDa [48–50]. Further demonstrating that this band corresponded to the F1 antigen, it was absent from the protein profile of the C12 strain of *Y. pestis* (Fig. 4A).

Likewise, when pelleting *Y. pestis* cultures after growth at 37°C with calcium, wild-type *Y. pestis* formed a flocculent pellet (data not shown). In contrast, when the  $\Delta$ *tatA* mutant was grown similarly, a very tight pellet was formed, similar to pelleted cultures of C12, the F1 antigen mutant (data not shown). This defect was due specifically to the loss of the *tatA* gene since a complemented mutant would once again form a flocculent pellet similar to wild-type cultures (data not shown).

When performing Western blot analysis with a monoclonal antibody to the F1 antigen with equal amounts of proteins extracted from the pellets of CO92,  $\Delta$ *tatA*, and C12 strains, similar results were obtained (Fig. 4B). A large prominent band was observed for the wild-type strain, a weaker band for the  $\Delta$ *tatA* mutant, and no band was apparent for the F1 antigen mutant. Recombinant F1 antigen was also included as a positive control and corresponded in size to the bands observed for the bacterial pellets (Fig. 4B). Similar results were observed with the discrepancy between the amount of F1 antigen observed in the supernatants collected from wild-type and  $\Delta$ *tatA* mutant cultures (data not shown). In addition, a control Western blot was performed using the same amount of protein but probing with a monoclonal antibody to GroEL, a 56-kDa molecular chaperone [51]. As shown in Fig. 4C and in contrast to the results observed with the anti-F1 antigen, no difference in the amount of GroEL was observed between strains.

To determine if synthesis or secretion of the V-antigen/LcrV, one of the *Yersinia* Yops which is surface exposed and serves many roles, one being necessary for translocation of the effector Yops [52–54], was also affected by deletion of the *tatA* gene; *Y. pestis* strains were grown at 37°C with MOX to induce expression of the low calcium response [4]. Proteins were collected from cell pellets, ran on SDS-PAGE gels, and tested by Western analysis using a monoclonal antibody to the V-antigen. As shown in Fig. 4D, no differences were observed for the presence of the V-antigen between strains in cell associated proteins, except for the *Y. pestis* strain which lacks the pLcr plasmid. Similar results were observed for proteins from culture supernatants (data not shown).

To attempt to define this defect in the concentration of the F1 antigen for the  $\Delta$ *tatA* mutant, *Y. pestis* cells were examined by microscopy using both IFM and IEM. As shown in Fig. 5A, when wild-type CO92 was grown under conditions to promote F1

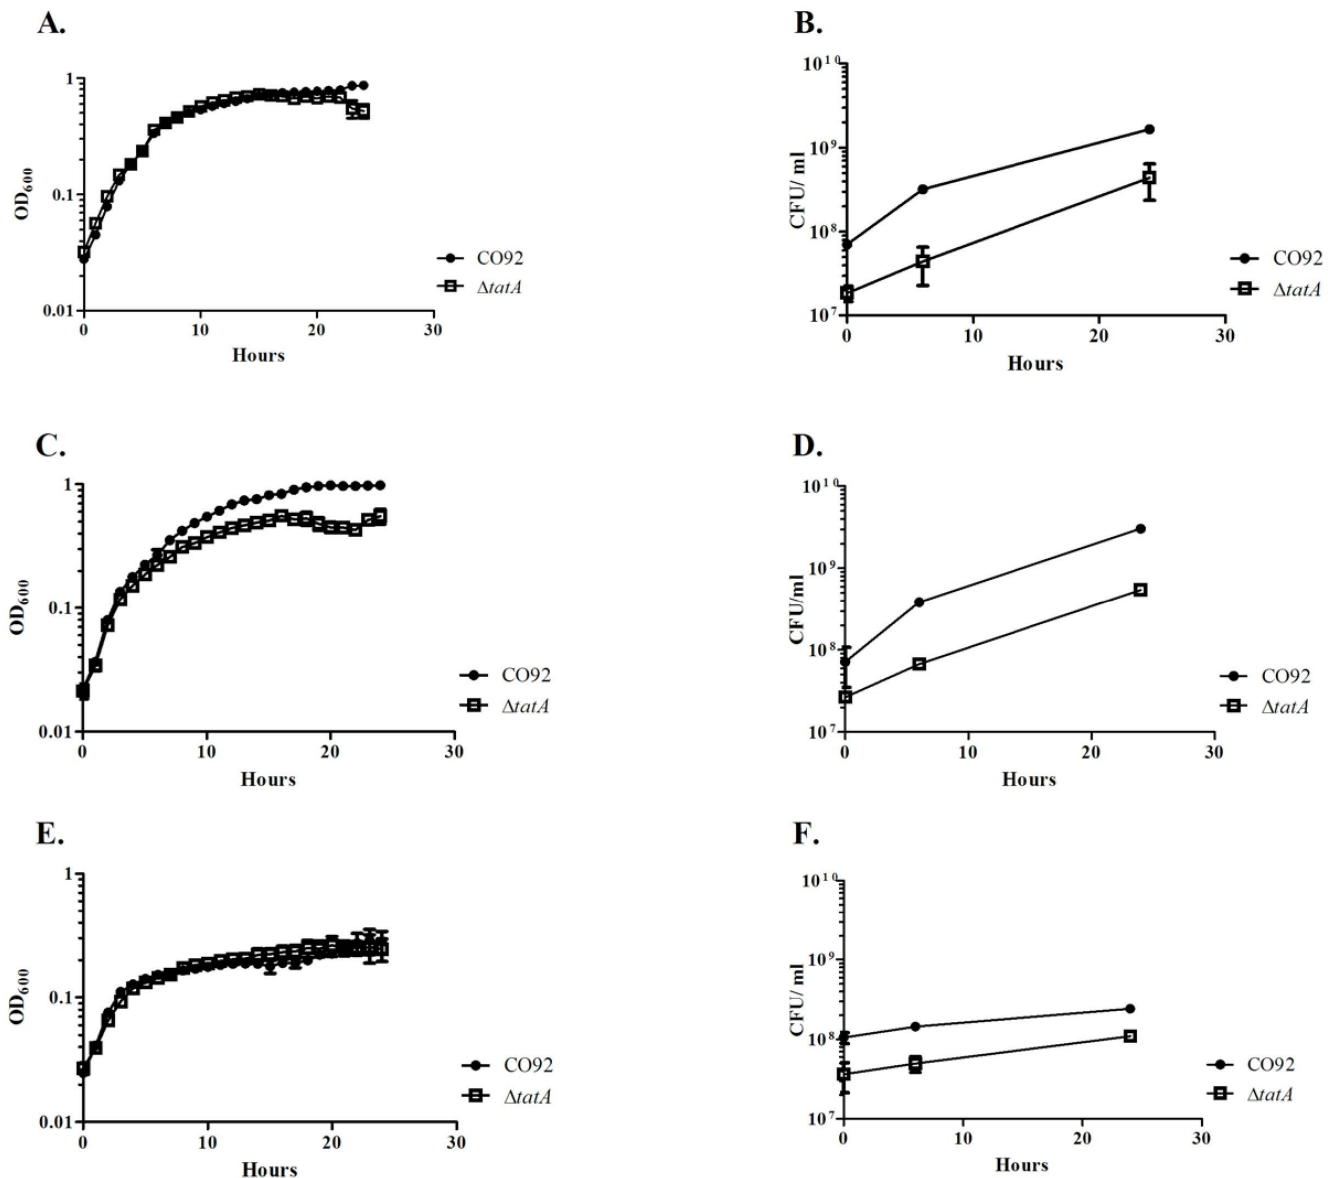

**Figure 1. Growth assays.** *Y. pestis* wild type and  $\Delta$ *tatA* mutant strains were grown in HI broth at 28°C (A and B), 37°C with CaCl<sub>2</sub> (C and D), or 37°C with MOX (E and F). Growth was monitored by both optical density (A, C, and E) and CFU counts (B, D, and F). OD measurements are based upon quadruplicate samples and bars represent standard deviation. CFU measurements are based upon triplicate samples and bars represent standard deviation. These data represent at least two separate experiments. doi:10.1371/journal.pone.0104524.g001

antigen synthesis and visualized by IFM using an antibody specific to the F1 antigen, the cells displayed a tight layer of fluorescence that surrounded the cells and in close association to the membrane. The  $\Delta$ *tatA* mutant was grown under identical conditions but was only slightly fluorescent, indicating the presence of low but still detectable levels of F1 antigen. (Fig. 5B) However, fluorescence was not as intense as observed with the parental strain. In addition, the labeling for the mutant appeared to be more diffuse around the cells and not as tightly associated. To determine if this defect was due specifically to the deletion of the *tatA* gene, we observed the complemented mutant strain by IFM (Fig. 5C). As expected, the fluorescence of the complemented  $\Delta$ *tatA* strain was restored to the intense fluorescent labeling that was associated with the wild-type bacterial cells. Also included in this study was the C12 strain which lacks the F1 antigen protein

and no fluorescent labeling of this strain was observed (data not shown).

We further confirmed these studies by IEM. As shown in Fig. 5D, wild-type cells were decorated with gold bead labeling, indicating the presence of the F1 antigen, both in contact with the outer bacterial membrane and surrounding the outer area. In contrast, the gold labeling observed with the  $\Delta$ *tatA* mutant was much less intense than the wild-type strain. The gold beads observed were rarely in association with the membrane but appeared diffuse away from the cell (Fig. 5E). The control for this study to demonstrate specificity of the labeling for the F1 antigen was the C12 strain. As shown in Fig. 5F, no gold beads were found associated with this strain.

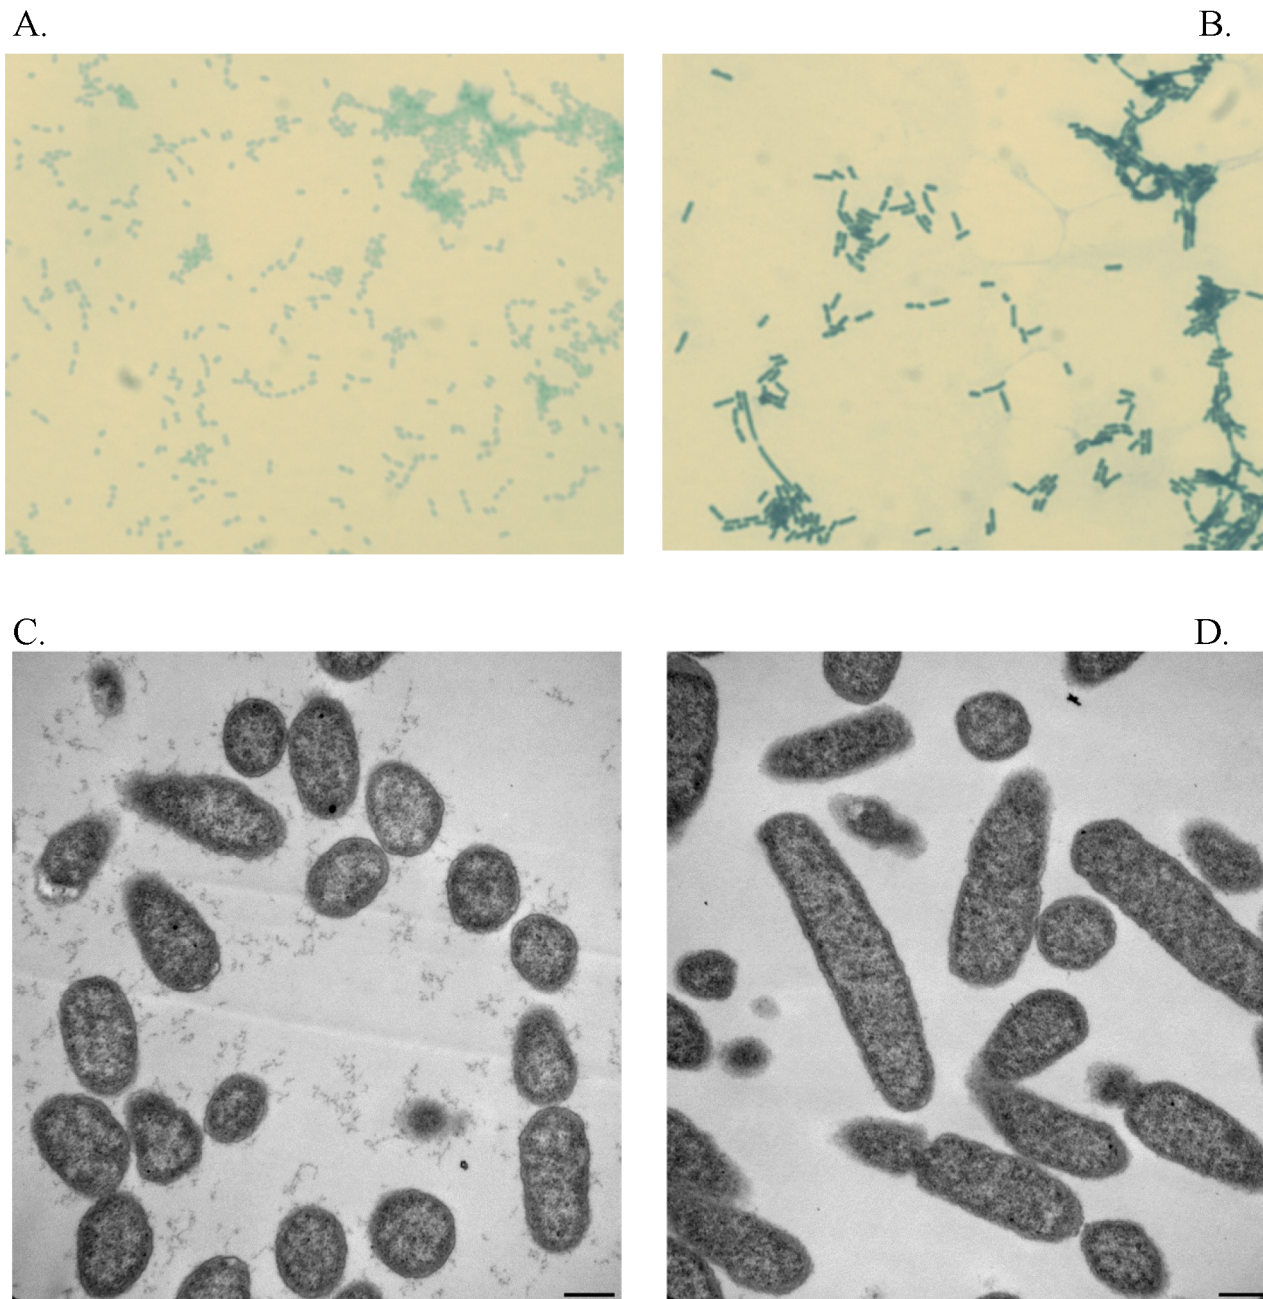

**Figure 2. Morphology of *Y. pestis* strains.** *Y. pestis* was grown at 37°C in presence CaCl<sub>2</sub> and examined by microscopy. The samples, wild-type (A) and  $\Delta$ *tatA* (B), were fixed, stained with Wayson stain, and examined by microscopy (100×). Additionally, samples, wild-type (C; micron bar = 0.5 μm) and  $\Delta$ *tatA* (D; micron bar = 0.5 μm), were examined by TEM. doi:10.1371/journal.pone.0104524.g002

The  $\Delta$ *tatA* mutant is attenuated in both bubonic and aerosol administered inhalational models of plague infection but not as attenuated following intranasal challenge

The virulence of the  $\Delta$ *tatA* mutant was assessed and compared to wild-type CO92 challenge through bubonic and pneumonic murine models (small-particle aerosol and intranasal instillation) of plague infection. From these assays, survival following challenge is shown in Fig. 6, and the LD<sub>50</sub> values were determined for each route and summarized in Table 3.

The LD<sub>50</sub> for the CO92 wild-type strain by the bubonic challenge route with Swiss Webster mice was determined to be only ~2 CFU (Fig. 6A and Table 3), in general agreement with previous estimates [55]. In contrast, the LD<sub>50</sub> for  $\Delta$ *tatA* mutant was calculated to be  $1.46 \times 10^7$  CFU (Fig. 6B and Table 3). To demonstrate this severe attenuation was due specifically to the deletion of the *tatA* gene, mice were then challenged with the complemented mutant. As expected, the LD<sub>50</sub> for the complemented  $\Delta$ *tatA* strain was restored to wild-type levels and determined to be ~1 CFU (Fig. 6C and Table 3).

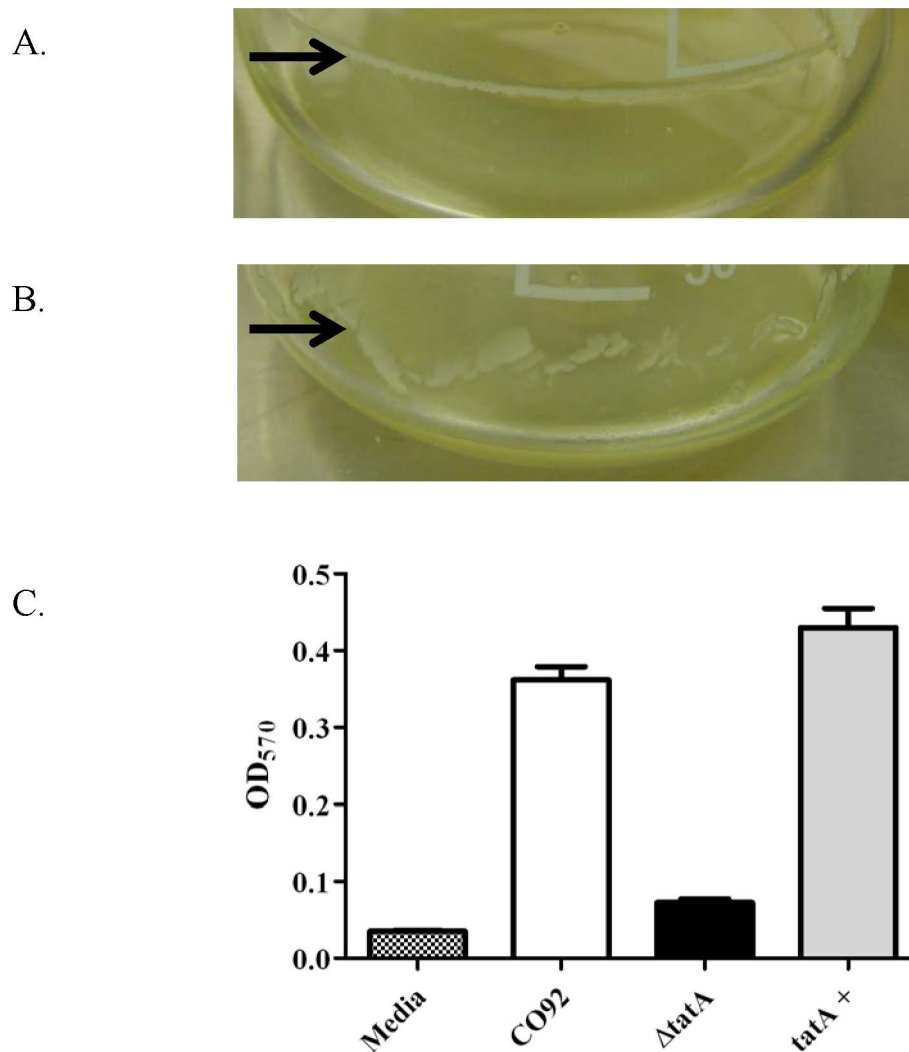

**Figure 3. Adherence of *Y. pestis* biofilm.** The *Y. pestis* A) wild-type CO92 and B)  $\Delta$ *tatA* mutant cultures were grown in HI broth at 26°C. Arrows indicate biofilm formation. C) To measure biofilm adherence, the biofilm of wild-type CO92,  $\Delta$ *tatA* mutant, and complemented  $\Delta$ *tatA* mutant was stained with crystal violet and assayed by absorbance as described in the Materials and Methods. The standard deviation was derived from quadruplicate samples. These data represent three separate experiments. doi:10.1371/journal.pone.0104524.g003

Next, mice were challenged by aerosol exposure with either the wild-type or  $\Delta$ *tatA* to determine if the mutant was also attenuated by this model of pneumonic challenge. The LD<sub>50</sub> for the CO92 strain was calculated to be  $6.7 \times 10^4$  CFU (Fig. 6D and Table 3), in general agreement with our previously published value of  $6 \times 10^4$  CFU [31]. In contrast, no mice succumbed to infection when challenged with the aerosolized  $\Delta$ *tatA* at an estimated inhaled dose up to  $9.43 \times 10^5$  CFU. When mice were challenged at two additional higher doses ( $2.65 \times 10^6$  and  $3.31 \times 10^6$ ), mortality was observed. However, the mice did not succumb to infection in a dose dependent manner (Fig. 6E). Therefore, we were not able to calculate a valid LD<sub>50</sub> measurement. Regardless, the LD<sub>50</sub> for the  $\Delta$ *tatA* mutant would be  $9.43 \times 10^5$  CFU.

Surprisingly, when performing intranasal challenges as an additional method of pneumonic infection with the wild-type and mutant, little difference was observed between the calculated LD<sub>50</sub> values between strains,  $1.4 \times 10^3$  CFU versus  $2.4 \times 10^3$  CFU, respectively (Figs. 6F,G and Table 3). Likewise, no differences in survival between groups of mice challenged at approximately

equal doses between the two strains were noted except for the  $\sim 10^3$  CFU challenge group (Table 4). In contrast, we observed a significant difference in TTD for mice challenged with the  $\Delta$ *tatA* as compared to the wild-type strain (Table 4). Mice challenged intranasally with  $\Delta$ *tatA* succumbed to infection at significantly later time points as compared to mice challenged with the wild-type strain at all doses (Table 4).

The course of disease was very different for mice challenged intranasally with the  $\Delta$ *tatA* mutant as compared to mice challenged with CO92. Whereas wild-type challenged mice succumbed to infection between 3–5 days (Table 4), approximately 1 week post challenge, the mice infected with the  $\Delta$ *tatA* mutant began to display signs of inner ear infection: holding their head at a tilt and then progressing to whole body spinning. However within a day or two, some mice clinically improved, even though residual tissue damage was noted during histological evaluation (discussed below). Other mice eventually succumbed to infection or were euthanized when moribund.



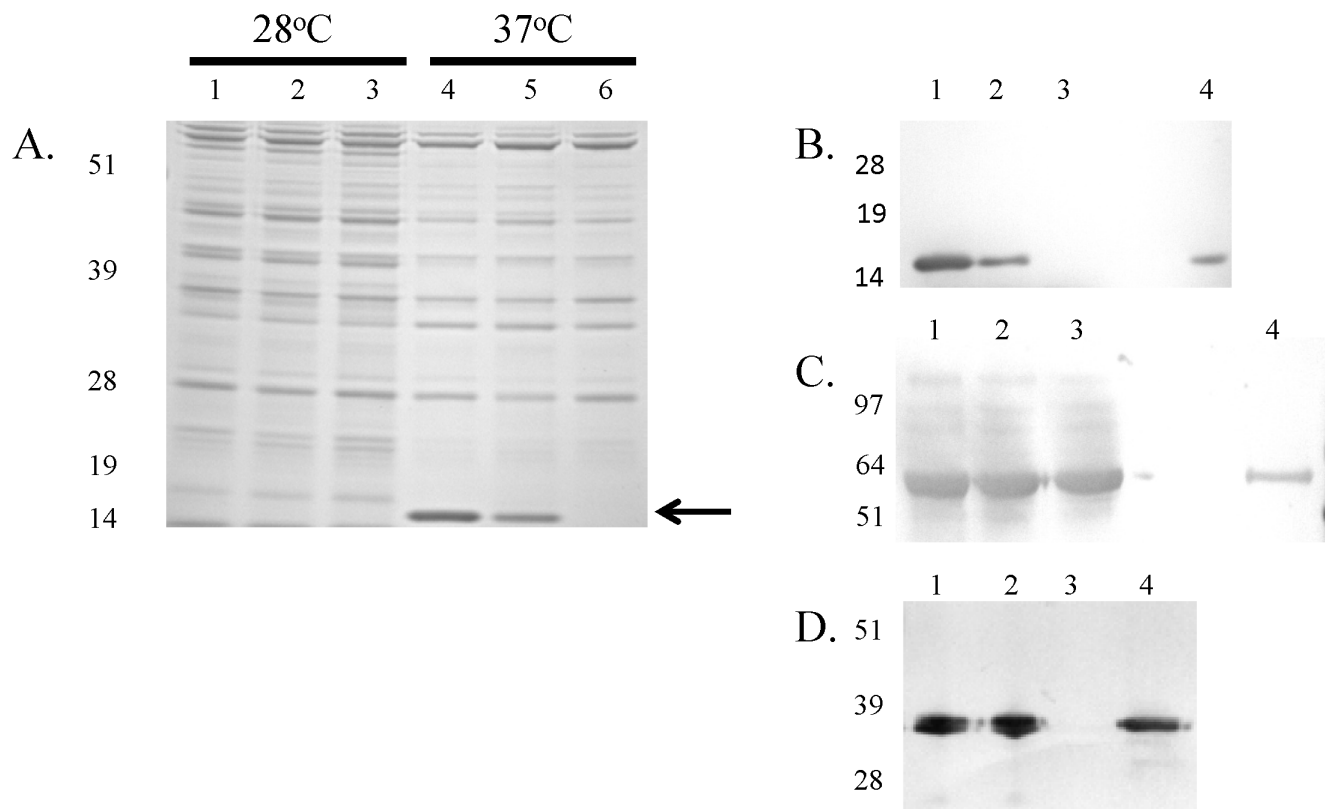

**Figure 4. Analysis of *Y. pestis* proteins.** A) Strains (wild-type, lanes 1 and 4;  $\Delta$ *tatA*, lanes 2 and 5, and C12, lanes 3 and 6) were grown in HI broth at 28°C or 37°C containing  $\text{CaCl}_2$ , as indicated. Proteins were extracted and ran on a SDS-PAGE gel at equal concentrations. The arrow indicates a protein band that is synthesized at 37°C for the CO92 and to a lesser extent the  $\Delta$ *tatA* mutant but not in C12, a F1-antigen mutant strain. Molecular masses are indicated on the left in kDa. Strains were grown in HI broth at 37°C containing  $\text{CaCl}_2$  and proteins extracted for Western analysis. Equal concentrations of proteins from *Y. pestis* strains were blotted with a monoclonal antibody to either the F1 antigen (B) or GroEL (C). Lanes: 1, wild-type; 2,  $\Delta$ *tatA*; 3, C12; and 4, recombinant protein (F1 antigen or GroEL, respectively). Molecular masses are indicated on the left in kDa. D) Strains were grown in HI broth at 37°C in the presence of MOX to create low calcium conditions. Equal concentrations of proteins from *Y. pestis* strains were blotted with an antibody to LcrV. Lanes: 1, CO92 wild-type; 2,  $\Delta$ *tatA*; 3, *Y. pestis* pLcr; and 4, rLcrV protein. Molecular masses are indicated on the left in kDa.

doi:10.1371/journal.pone.0104524.g004

Histologic examination of cranial sections of mice infected intranasally with the  $\Delta$ *tatA* mutant (Fig. 7A) or the wild-type CO92 strain (Fig. 7C) showed severe middle ear involvement, which was usually bilaterally present. The high incidence of infection/inflammation of the inner and external ear canal was most likely related to the intranasal route of exposure. Lesions were characterized by necrosuppurative inflammation with marked bacterial colonization in the associated bone marrow within the tympanic bulla, inner ear, and/or external ear (Fig. 7A–C). Bacteria were confirmed to be *Y. pestis* through immuno-histochemical (IHC) staining with antibody to the F1 capsule which is specific for *Y. pestis* [56,57] (Fig. 7B).

Histologic examination of many of the mutant challenged mice (8/10) that succumbed to infection revealed moderate meningitis of the ventral meninges of the cerebrum and/or cerebellum. The areas of meningitis were characterized by necrotic debris and neutrophils admixed with fibrin, coccobacilli, and congested vessels (Fig. 7A and B). The meningitis in the ventral aspect of the cerebrum/cerebellum is probably an extension of inflammation/necrosis from the nasopharynx/nasal cavity and/or middle/inner ear through the osseous structures of the cranium. Again, the bacteria were confirmed to be *Y. pestis* through IHC staining with anti-F1 antibody (Fig. 7B). In addition, three of the mice which survived 21 days post challenge with higher doses of the  $\Delta$ *tatA*

mutant still retained a head tilt and histologic lesions consisted of meningitis characterized by necrosis and neutrophilic inflammation admixed with macrophages and fibrous connective tissue (data not shown).

In the case of CO92-infected mice, disease progression following intranasal instillation was much quicker as compared to challenge with the mutant strain, and the resulting illness was acute. In wild-type exposed mice, the presence of *Y. pestis* in the inner ear did not progress to meningitis because the time from exposure to the succumbing to infection was too short for lesions to develop (Fig. 7C), as opposed to what was observed with mice infected with the  $\Delta$ *tatA* mutant strain (Fig. 7A). The lungs of the intranasal challenged mice from both the wild-type and the mutant were also examined. Overall, lung lesion development and characteristics were the same between mice challenged with either strain (Figs. 7 D–E).

To determine if the presence of *Y. pestis* bacteria within the inner ear was specific to exposure by the intranasal route, pathology samples were also examined from mice challenged by small particle aerosol with either the wild-type or mutant strain. In contrast to the observations with intranasal challenged mice (Fig. 7A–C), no inflammation or bacterial colonization was observed in the inner ear or meningeal areas for mice challenged via small-particle aerosol delivery for the *Y. pestis* strains (Figs. 8A

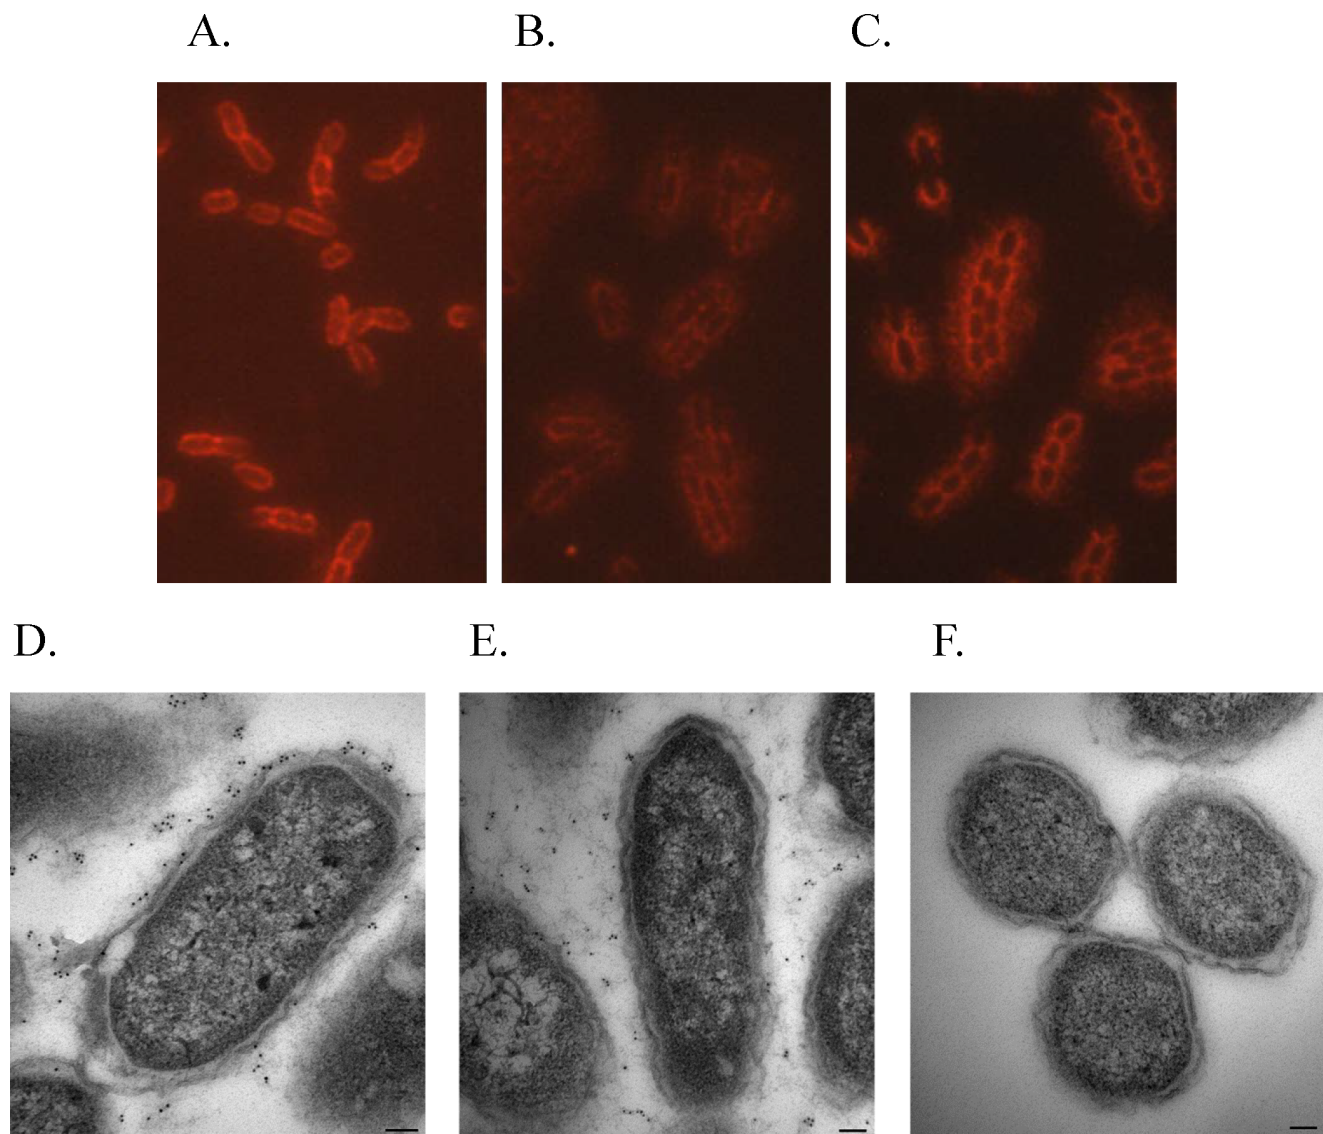

**Figure 5. Localizing the F1 capsule by microscopy.** *Y. pestis* strains were grown at 37°C in HI broth containing CaCl<sub>2</sub> and exposed to an antibody against the F1 capsule. IFM samples: A) wild-type, B)  $\Delta$ *tatA* mutant, and C) complemented  $\Delta$ *tatA* mutant. The images (100 $\times$ ) were captured for all samples at identical camera settings to maintain relative fluorescence. IEM samples: D) wild-type (micron bar=0.1  $\mu$ m), E)  $\Delta$ *tatA* mutant (micron bar=0.1  $\mu$ m), and F) C12, F1 negative (micron bar=0.5  $\mu$ m). doi:10.1371/journal.pone.0104524.g005

and B). Additionally, lungs were examined from mice challenged by aerosol with each strain (Figs. 8C and D). Again, there was no difference in lung lesion characters or severity in mice challenged between strains.

#### The recovery and dissemination of the $\Delta$ *tatA* mutant is hindered after intranasal challenge

Since there was little difference in the intranasal LD<sub>50</sub> calculated between strains but a significant increase in TTD for mutant challenged mice, the dissemination of wild-type and mutant bacteria following intranasal challenge was compared. Groups of mice were separately challenged with approximately equal doses of either CO92 (113,000 CFU) or the  $\Delta$ *tatA* mutant (76,000 CFU). For mice challenged with wild-type CO92, CFU recovery from the lungs showed some progression by day 1 and then increased rapidly for days 3 and 4 for all mice tested

(Fig. 9A). By day 3, only four mice were alive for testing, while the remaining animals had succumbed to infection. For recovery of CFU from the spleen, wild-type bacteria were detected for one mouse by day 1; however, spleens for all mice had increased bacterial burden loads by days 2 and 3 (Fig. 9B).

In contrast, mice challenged intranasally with the  $\Delta$ *tatA* mutant were severely delayed in progression of bacterial dissemination. Recovery of bacteria from the lungs 2 h postchallenge did not differ greatly between the wild-type and mutant strains (5.8% versus 4.2%, respectively) (Fig. 9A). Therefore, differences in tissue tropism or bacterial adherence to host cells after initial exposure would not appear to be a factor for the delay. However, through day 2, recovery of the  $\Delta$ *tatA* mutant from the lungs decreased. For the remainder of the study, a slight increase in CFU was detected in the lungs. However, at least one mouse out of the five tested for each time point starting on day 2 had no *Y. pestis* recovered from the lungs (Fig. 9A). A similar delay was observed for trafficking of

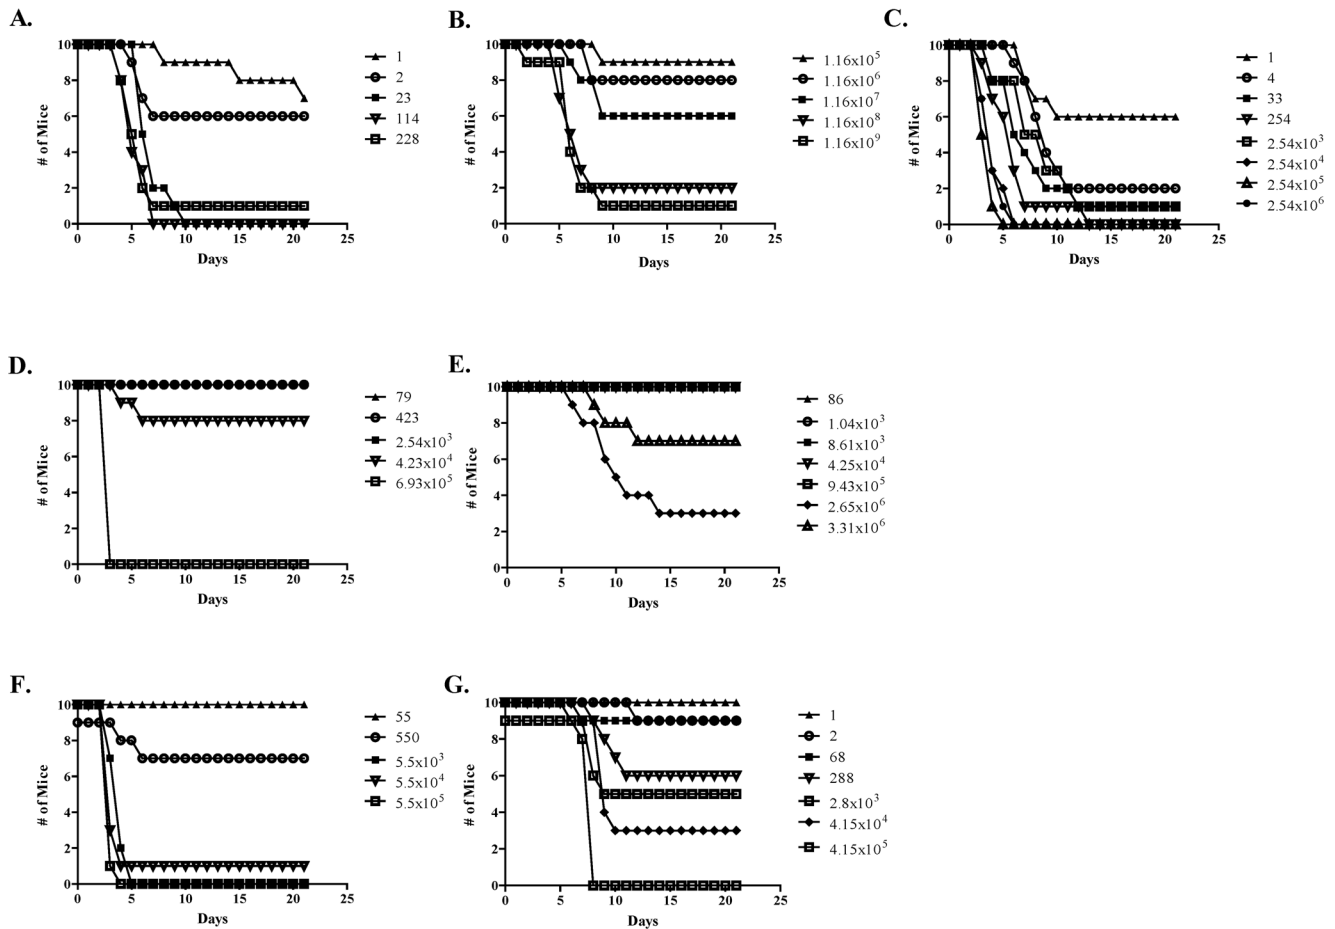

**Figure 6. Animal challenge data.** Groups of Swiss Webster mice were challenged and survival monitored following various plague models of infection (sub-Q injections A–C; small-particle aerosol D and E; and intranasal F and G) with various strains of *Y. pestis* (wild-type A, D, and F;  $\Delta$ *tatA* mutant B, E, and G; and the complemented  $\Delta$ *tatA* mutant C). The calculated LD<sub>50</sub> values are included in Table 3. doi:10.1371/journal.pone.0104524.g006

the mutant to spleens (Fig. 9B). On day 4, one mouse did show a high bacterial burden. However, the majority of bacteria were recovered from spleens between days 5–9. As was the case observed for the lungs, at least one mouse for each time point (except for day 7),  $\Delta$ *tatA* bacteria were not recovered from the spleens (Fig. 9B).

**Screening the *Y. pestis* genome for Tat motifs**

To determine how the deletion of the *tatA* gene could affect capsule formation or other known virulence factors, the CO92 *Y. pestis* genome was screened for proteins containing the Tat motif

(SRRXFLK) [7]. A previous study employing the TATFIND computer program identified 19 *Y. pestis* proteins predicted to be secreted via the Tat translocation pathway [58]. None of the proteins identified in this study as Tat secreted proteins appears to be directly linked to defect in capsule, biofilm formation, or other known *Y. pestis* virulence factors. Additionally, there is sufficient evidence to suggest that there is some degree of fluidity in the composition and organization of this domain [59–62]. Therefore, we decided to conduct an *in silico* search allowing more flexibility at each position. Table 5 lists nine proteins which contain Tat-like motifs in the N terminal region, four that are unique to this study.

**Table 3.** Calculated LD<sub>50</sub> for the CO92 wild-type and  $\Delta$ *tatA* mutant *Y. pestis* strains.

| Strain                          | LD <sub>50</sub> sub-Q.    | LD <sub>50</sub> aerosol <sup>a</sup> | LD <sub>50</sub> intranasal |
|---------------------------------|----------------------------|---------------------------------------|-----------------------------|
| Wild-type CO92                  | ~2 CFU                     | 6.7 × 10 <sup>4</sup> CFU             | 1.4 × 10 <sup>3</sup> CFU   |
| $\Delta$ <i>tatA</i>            | 1.46 × 10 <sup>7</sup> CFU | >9.43 × 10 <sup>5</sup> CFU           | 2.4 × 10 <sup>3</sup> CFU   |
| $\Delta$ <i>tatA</i> complement | ~1 CFU <sup>b</sup>        | ND <sup>c</sup>                       | ND <sup>c</sup>             |

<sup>a</sup>Calculated inhaled dose.

<sup>b</sup>A significant difference was observed between the LD<sub>50</sub> determinations between the  $\Delta$ *tatA* mutant and complemented strain (*p*<0.0001).

<sup>c</sup>Not determined.

doi:10.1371/journal.pone.0104524.t003

**Table 4.** Survival and TTD comparisons between mice challenged intranasally with the  $\Delta$ *tatA* mutant and wild-type *Y. pestis* strains.

| Strain               | Dose (CFU) | Total | Alive | % Survival | p value | TTD $\pm$ SD <sup>a</sup> | p value  |
|----------------------|------------|-------|-------|------------|---------|---------------------------|----------|
| CO92                 | 550        | 9     | 7     | 78         | 0.63    | 5.00 $\pm$ 1.14           | 0.0402*  |
| $\Delta$ <i>tatA</i> | 288        | 10    | 6     | 60         |         | 9.25 $\pm$ 1.71           |          |
| CO92                 | 5,500      | 10    | 0     | 0          | 0.01*   | 3.90 $\pm$ 0.74           | <0.0001* |
| $\Delta$ <i>tatA</i> | 2,880      | 9     | 5     | 56         |         | 8.25 $\pm$ 0.50           |          |
| CO92                 | 55,000     | 10    | 1     | 10         | 0.582   | 3.22 $\pm$ 0.44           | <0.0001* |
| $\Delta$ <i>tatA</i> | 41,500     | 10    | 3     | 30         |         | 8.86 $\pm$ 0.90           |          |
| CO92                 | 550,000    | 10    | 0     | 0          | 1       | 3.10 $\pm$ 0.32           | <0.0001* |
| $\Delta$ <i>tatA</i> | 415,000    | 10    | 0     | 0          |         | 7.70 $\pm$ 0.67           |          |

<sup>a</sup>Time to death  $\pm$  standard deviation in days.\*Statistical differences were considered significant when  $p < 0.05$ .  
doi:10.1371/journal.pone.0104524.t004

From our search, we identified several proteins that have been associated with the Tat translocation system in other bacteria (TauA, SufI, DmaA and NapA). From the newly identified Tat secreted candidates; we did not establish any direct links to the phenotypes observed for the *Y. pestis* mutant. However, there were several hypothetical proteins identified that warrant further characterization, such as YPO2150, a LysR regulator.

## Discussion

In this study, we examined the role of the Tat translocation system in a fully virulent *Y. pestis* strain. The disruption of the Tat pathway by the in-frame deletion of the *tatA* gene led to several interesting phenotypes. The morphology of the mutant bacteria was severely altered and tended to have a more bacillus shape than the typical shape of *Y. pestis* (Fig. 2). The effect this structural alteration would have specifically on virulence of the  $\Delta$ *tatA* strain remains to be determined.

The change in shape of the  $\Delta$ *tatA* mutant is likely due to the defect in cell division as was previously described for *tat* mutations in *E. coli*, *Burkholderia thailandensis*, and *Helicobacter pylori* [25,46,47]. In screening the *Y. pestis* genome for Tat motifs, the SufI protein sequence contained a putative Tat signal [58]. SufI was previously shown to be transported by the Tat system [60] and to also suppress cell division [63]. However, *E. coli* mutants in the *sufI* gene do not show these cell morphology defects [46,63].

In addition to the altered morphology of the bacteria, the  $\Delta$ *tatA* bacteria had a defect in biofilm integrity. The mutant strain was able to synthesize a biofilm; however, the adherence of the biofilm to the substrate was weak and could easily be dislodged (Fig. 3). Defects in biofilm formation have been observed in other bacteria when mutated in *tat* genes [17,20,22,64,65]. Currently, the exact reason for the loss of biofilm adherence in the *Y. pestis*  $\Delta$ *tatA* mutant remains to be determined. For *tat* mutants in other bacteria, the decrease in biofilm production was due to loss of flagella motility or pili-twitching [20,22]. However, *Y. pestis* is non-motile due to a mutation within the *flhD* gene [45].

The distribution and/or localization of the F1 antigen of the  $\Delta$ *tatA* mutant was also affected despite the CafI or other related proteins not possessing an obvious Tat motif. The F1 antigen is synthesized on the bacterial surface through a chaperone/usher pathway [48,66]. When performing Western analyses with an anti-F1 antibody and proteins of lysed whole cell or supernatants, a band corresponding to the F1 protein was still observed with the  $\Delta$ *tatA* mutant, but the intensity was less than with the parenteral strain (Fig. 4A). In addition, when examining these strains by IFM or IEM with an antibody to the F1 protein, both the wild-type and mutant strains were highly labeled. However, the amount of membrane associated F1 antigen detected with the  $\Delta$ *tatA* mutant was diminished (Fig. 5).

It appears that the F1 antigen protein was able to be secreted but unable to localize properly to the outer membrane surface of *Y. pestis*. The protein would then diffuse away from the cell. It has been previously reported that the CafI usher is necessary for assembly of F1 antigen onto the surface of the bacteria but not for secretion into the extracellular media [48,67]. Additionally, various novel chaperone/usher loci have been described for *Y. pestis* that play some role with biofilm and F1 capsule synthesis [68]. Perhaps the initial assembly and anchoring of the F1 protein onto the surface of the *Y. pestis*  $\Delta$ *tatA* mutant is altered due to loss of some chaperone/usher transported by the Tat system.

When examining the *Y. pestis*  $\Delta$ *tatA* for virulence defects, the mutant was severely attenuated in a bubonic model of infection. The LD<sub>50</sub> for the  $\Delta$ *tatA* mutant was 10<sup>7</sup> times higher as compared

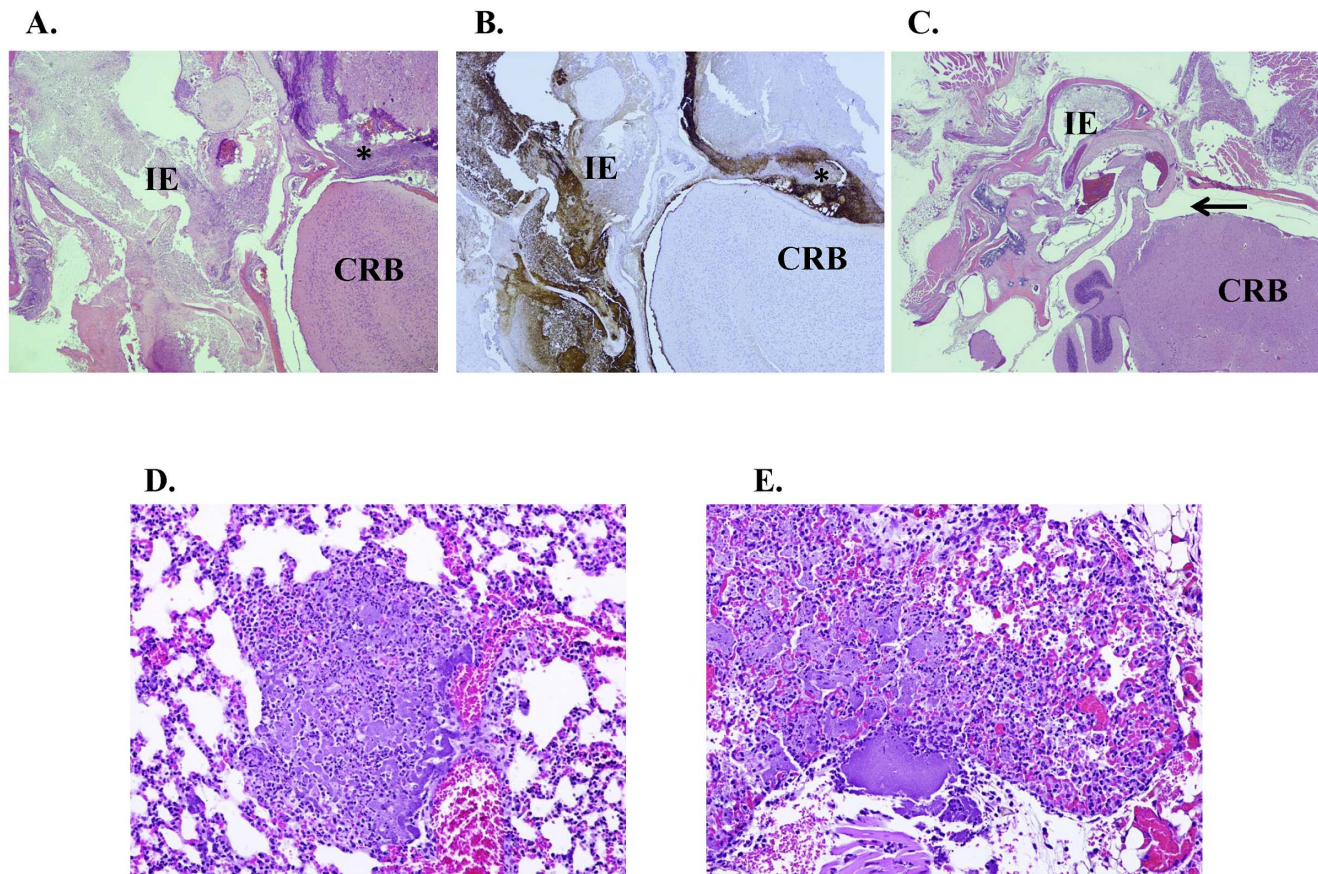

**Figure 7. Pathology of mice challenged intranasally with *Y. pestis*.** A and B) Skull sections (4×) of a mouse challenged with the  $\Delta$ *tatA* mutant (2,800 CFU). The mouse was moribund and euthanized on day 8 postchallenge. Note inflammation (indicated by \*) that extends into the cranial vault and meninges. Panel A shows HE staining, and Panel B shows IHC staining with antibody to the F1 capsule. C) HE stained section from a mouse (2×) challenged with wild-type *Y. pestis* (5,500 CFU) that succumbed to infection on day 3 post challenge. In contrast to panel A, the inflammation for mice challenged with the wild-type strain, is contained in the inner ear area and did not extend into the brain (arrow). D and E) Lung sections of mice challenged intranasally with *Y. pestis*. Overall, lung lesion development and character are the same between strains with necrosuppurative inflammation surrounding large colonies of bacteria. Panel D is of a lung section stained with HE (20×) from a mouse challenged with the  $\Delta$ *tatA* mutant. Panel E is of a lung section stained with HE (20×) challenged with wild-type *Y. pestis*. IE = inner ear; CRB = cerebrum. doi:10.1371/journal.pone.0104524.g007

to the parental strain (Table 3). We demonstrated that this defect was due specifically to the loss of the *tatA* gene through restoring virulence via complementation. When the  $\Delta$ *tatA* mutant was tested in pneumonic models of plague, contrasting results between delivery methods were observed. When whole-body small-particle aerosol challenges were performed, the LD<sub>50</sub> for the  $\Delta$ *tatA* mutant would be greater than 14 times of the wild-type CO92 strain (Table 3). We were not able to calculate a reliable LD<sub>50</sub> measurement from the survival curve for challenged mice due to a lack of a monotonic response. However, other attenuated strains of *Y. pestis* have demonstrated a poor dose response in animal models of plague challenge [31,69,70]. Though the mutant was not as attenuated via aerosol challenge as was observed with the bubonic model, this is not unprecedented. Differences in virulence have been observed frequently with other *Y. pestis* mutants dependent upon the routes of challenge [31,43,55,71–73].

In contrast to the differences in LD<sub>50</sub> measurements observed with the other models of challenge, the LD<sub>50</sub> for the  $\Delta$ *tatA* mutant was only 1.7 times higher than the wild-type strain by intranasal challenge (Table 3). However, the mutant did display attenuation by other measurements of virulence following intranasal instillation: TTD (Table 4) and delayed dissemination and recovery from

organs following challenge (Fig. 9). Interestingly, the  $\Delta$ *tatA* mutant virulence data are very similar to the results previously reported with a  $\Delta$ *pla* mutant in regards to minimal difference between LD<sub>50</sub> values but large differences in TTD and CFU recoveries following intranasal challenge [74].

The intranasal challenge model is useful to study pathogenesis of infectious diseases, including pneumonic plague [74–78]. It is possible that the presence of bacteria, both wild-type and  $\Delta$ *tatA* mutant, within the inner ear may be due to the delivery method. For wild-type *Y. pestis*, pneumonic plague and death occurs so rapidly that disease from the inner ear is not able to progress to meningitis. In contrast, infection with the  $\Delta$ *tatA* mutant is slowed which allows the bacteria to persist within the inner ear and then eventually reach the brain. Interestingly, a recent article described the ability of *Y. pestis* to create a localized anti-inflammatory state that creates a protective environment for itself and other non-pathogenic bacteria in the immediate vicinity [79]. Perhaps the  $\Delta$ *tatA* mutant, though attenuated by other methods of challenge, becomes an “opportunistic pathogen” when able to gain access for a prolonged time to the inner ear of a mouse and create a suitable environment for it to infect the host.

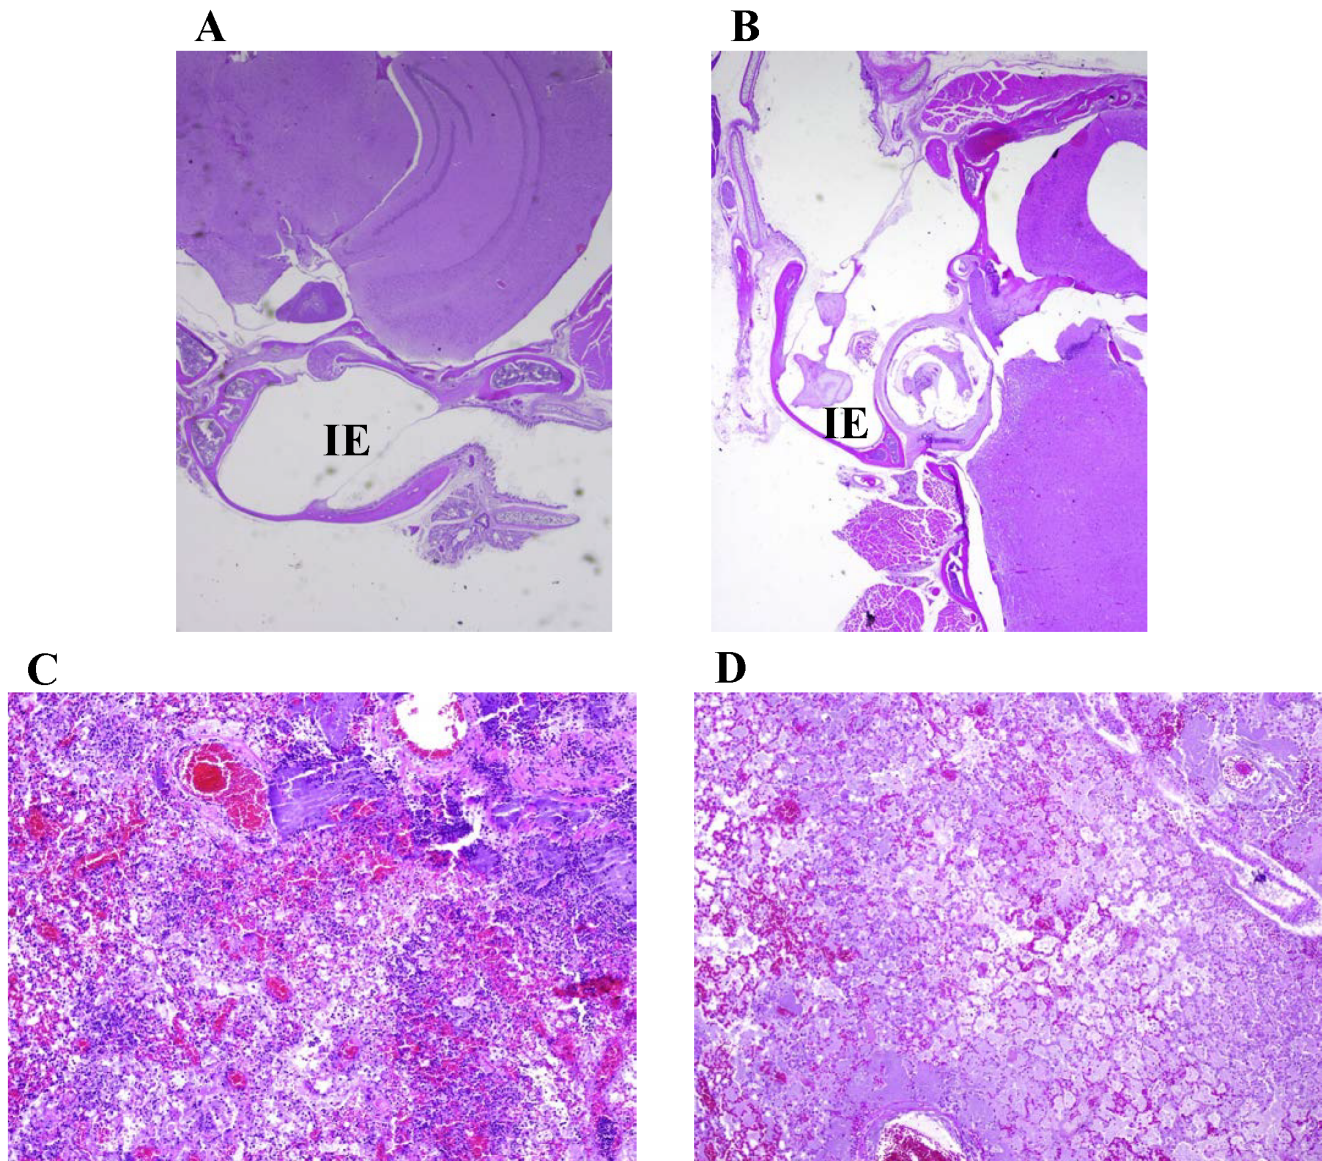

**Figure 8. Pathology of mice challenged with *Y. pestis* by small particle aerosol.** A and B) HE stained skull sections of aerosol challenged mice. A) Mouse (2×) challenged with wild-type CO92 ( $6.9 \times 10^5$  CFU) that was moribund and euthanized on day 3 postchallenge. B) Mouse (4×) challenged with  $\Delta tatA$  mutant ( $3.3 \times 10^6$  CFU) that was moribund and euthanized on day 7 postchallenge. No inner ear (IE) or meningeal involvement was detected for mice aerosol challenged with either strain of *Y. pestis*. HE stained lung sections (10×) of mice aerosol challenged with CO92 (C) or  $\Delta tatA$  mutant (D). There was no difference in lesion character or severity in mice challenged with either strain. doi:10.1371/journal.pone.0104524.g008

Challenges by intranasal instillation versus small-particle aerosol differ in many aspects. Namely, the sizes of the particles generated differ between the two routes and would therefore colonize different parts of the lung and body. The smaller particles generated by a whole-body aerosol chamber would be inhaled deeper into the lung. In contrast, the particles from intranasal challenges would be much larger and would infect both the upper and lower respiratory tract and be much more likely to be swallowed and infect the digestive system. Similar to the results from our current study, mice that were challenged by intranasal delivery with *Burkholderia pseudomallei* also showed a high incidence of meningitis [80]. In addition, other studies have shown differences between intranasal or aerosol delivery in dissemination of bacterial pathogens [80,81] or inflammation response to allergens [82] in mice.

It would be tempting to speculate that the loss of virulence associated with the  $\Delta tatA$  mutant is due to the altered F1 antigen. However, it has been shown by others that loss of the *Y. pestis* F1 antigen had little to or no difference in virulence in mice [72,83–87]. In contrast, Sebbane et al. demonstrated that *Y. pestis* deleted of the *cafIMIAI* operon are affected in their ability to cause bubonic plague in mice following flea bites [88]. As the  $\Delta tatA$  mutant was severely hindered following subcutaneous infection and displays an altered F1 antigen, it would be interesting to determine if it would be similarly defective via a flea bite route of infection. In addition, a recent study demonstrated a *cafI* deletion mutant in the CO92 strain of *Y. pestis* was attenuated by bubonic and pneumonic (intranasal) models of infection depending on the strain of mouse [77]. Our current challenge studies with the  $\Delta tatA$  mutant were limited to Swiss Webster mice. It would be of interest

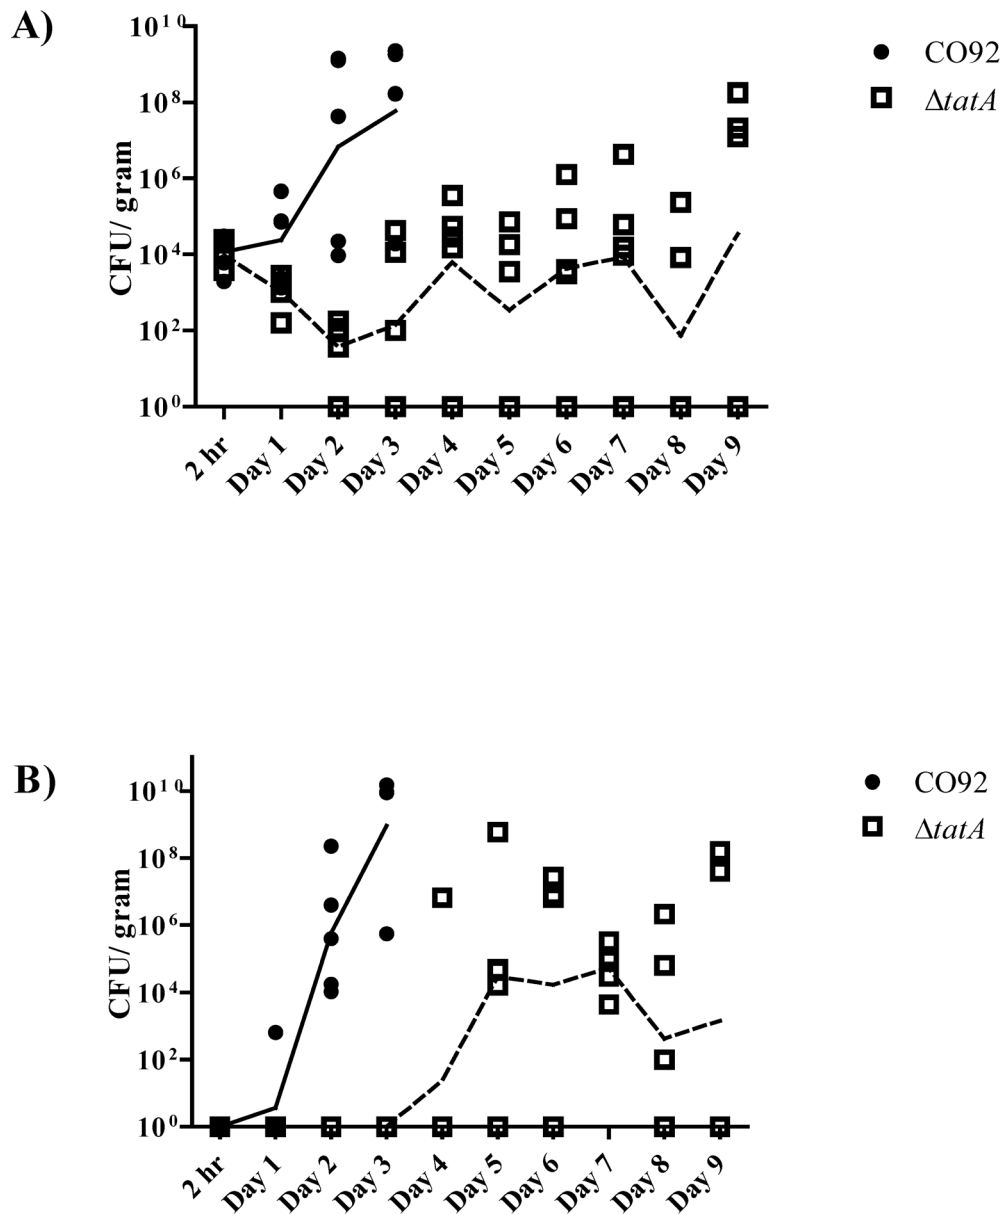

**Figure 9. Dissemination studies of mice challenged intranasally with *Y. pestis*.** Mice were challenged with CO92 (113,000 CFU) or  $\Delta$ *tatA* mutant (76,000 CFU). At set time points, mice were euthanized, and the lungs and spleens were harvested. The A) lungs and B) spleens were homogenized and plated to determine bacterial recovery. For each time point, five mice were assayed, except for day 3 for wild-type challenged mice. Only four mice were tested as the remaining challenged mice had succumbed to infection. The lines (solid = CO92 and hashed =  $\Delta$ *tatA*) are connecting at the geometrical means at the data points of CFU recovery from the respective organs are represent the overall trend during the course of infection.  
doi:10.1371/journal.pone.0104524.g009

to extend these studies to additional mouse strains as described by Weening et al. [77] to determine if the  $\Delta$ *tatA* mutant would be more attenuated by the intranasal challenge model of plague.

Based upon proteomic and bioinformatic analysis of *E. coli* and *B. subtilis*, as much as 5–8% of secreted proteins are translocated by the Tat pathway [89]. A previous study using the TATFIND computer program, identified a total of 19 putative Tat secreted proteins [58]; however, none of the candidates seemed likely to be effectors of the phenotypes observed in the mutant. To identify *Y. pestis* Tat secreted proteins that may be responsible for the loss of virulence, biofilm adherence, or the altered F1 protein, the *Y. pestis* CO92 genome was screened for proteins containing the Tat-

like motifs within the N-terminal portion substituting similar amino acids for the consensus motif sequence. Nine proteins were identified during this screen five of which have homologs demonstrated to be Tat translocation products in other bacterial species [19,63,90,91]. However, many of the identified *Y. pestis* proteins from both of these studies are hypothetical or potential putative proteins of broad function. For instance, YPO2150 is a predicted transcriptional regulator and a member of the LysR family which can regulate capsule, fimbriae, and biofilm production in other bacterial pathogens [92–94]. In addition, novel chaperone/usher loci were recently described for *Y. pestis* [68].

**Table 5.** *Y. pestis* proteins containing putative Tat motifs.

| Motif*   | Protein | Product                                                 |
|----------|---------|---------------------------------------------------------|
| SRRSFLQ  | TauA    | taurine transporter substrate binding subunit**         |
| SRRSFLQ  | Sufl    | repressor protein for FtsI**                            |
| TRRKFLM  | YPO0986 | hypothetical protein**                                  |
| SRRLLALL | YPO2150 | LysR family transcriptional regulator                   |
| SRREFIQ  | DmsA    | putative dimethyl sulfoxide reductase chain A protein** |
| SRRDFMK  | NapA    | nitrate reductase catalytic subunit**                   |
| TRRDALA  | YadG    | putative ABC transporter ATP-binding protein            |
| SRRLLAIL | YPO3648 | putative 2-hydroxy-3-oxopropionate reductase            |
| TRRIFIL  | YPO0009 | putative membrane transport protein                     |

\*Underlined letters indicate substitution with a similar amino acid from the consensus Tat motif (SRRXFLK).

\*\*Indicates a protein that overlaps with a previous study [58] that identified predicated Tat substrates from the CO92 *Y. pestis* genome. doi:10.1371/journal.pone.0104524.t005

Perhaps the Tat pathway interacts with these proteins and is able to directly or indirectly affect virulence.

Obviously, other Tat translocated proteins must exist in *Y. pestis* which affect pathogenesis. Recently, other proteins which utilize the Tat system but lack the signal motif were identified [59]. A more thorough examination utilizing more sophisticated methods would need to be pursued to identify *Y. pestis* Tat secreted proteins. It is likely that some of these proteins may be important virulence factors. Finally, this study further demonstrates the possibility of targeting the Tat pathway for novel therapeutics not only for *Y. pestis* but for many other bacterial pathogens.

## References

- Worsham PL, McGovern TW, Vietri NJ, Friedlander AM (2007) Plague. In: Dembek ZF, editor. Medical Aspects of Biological Warfare. Washington, DC: Office of The Surgeon General. 91–119.
- Perry RD, Fetherston JD (1997) *Yersinia pestis*—etiologic agent of plague. Clin Microbiol Rev 10: 35–66.
- Cornelis GR, Biot T, Lambert de Rouvroit C, Michiels T, Mulder B, et al. (1989) The *Yersinia yop* regulon. Mol Microbiol 3: 1455–1459.
- Straley SC (1991) The low-Ca<sup>2+</sup> response virulence regulon of human-pathogenic *Yersinia*. Microb Pathog 10: 87–91.
- Bozue J, Cote CK, Webster W, Bassett A, Tobery S, et al. (2012) A *Yersinia pestis* YscN ATPase mutant functions as a live attenuated vaccine against bubonic plague in mice. FEMS Microbiol Lett 332: 113–121.
- Mori H, Ito K (2001) The Sec protein-translocation pathway. Trends Microbiol 9: 494–500.
- Berks BC (1996) A common export pathway for proteins binding complex redox cofactors? Mol Microbiol 22: 393–404.
- Buchanan G, de Leeuw E, Stanley NR, Wexler M, Berks BC, et al. (2002) Functional complexity of the twin-arginine translocase TatC component revealed by site-directed mutagenesis. Mol Microbiol 43: 1457–1470.
- de Leeuw E, Granjon T, Porcelli I, Alami M, Carr SB, et al. (2002) Oligomeric properties and signal peptide binding by *Escherichia coli* Tat protein transport complexes. J Mol Biol 322: 1135–1146.
- De Leeuw E, Porcelli I, Sargent F, Palmer T, Berks BC (2001) Membrane interactions and self-association of the TatA and TatB components of the twin-arginine translocation pathway. FEBS Lett 506: 143–148.
- Gohlke U, Pullan L, McDevitt CA, Porcelli I, de Leeuw E, et al. (2005) The TatA component of the twin-arginine protein transport system forms channel complexes of variable diameter. Proc Natl Acad Sci U S A 102: 10482–10486.
- Porcelli I, de Leeuw E, Wallis R, van den Brink-van der Laan E, de Kruijff B, et al. (2002) Characterization and membrane assembly of the TatA component of the *Escherichia coli* twin-arginine protein transport system. Biochemistry 41: 13690–13697.
- Baglieri J, Beck D, Vasisht N, Smith CJ, Robinson C (2012) Structure of TatA paralogs, TatE, suggests a structurally homogeneous form of Tat protein translocase that transports folded proteins of differing diameter. J Biol Chem 287: 7335–7344.
- Wexler M, Sargent F, Jack RL, Stanley NR, Bogsch EG, et al. (2000) TatD is a cytoplasmic protein with DNase activity. No requirement for TatD family proteins in sec-independent protein export. J Biol Chem 275: 16717–16722.
- Bronstein PA, Marrichi M, Cartinhour S, Schneider DJ, DeLisa MP (2005) Identification of a twin-arginine translocation system in *Pseudomonas syringae* pv. tomato DC3000 and its contribution to pathogenicity and fitness. J Bacteriol 187: 8450–8461.
- Chen L, Hu B, Qian G, Wang C, Yang W, et al. (2009) Identification and molecular characterization of twin-arginine translocation system (Tat) in *Xanthomonas oryzae* pv. oryzae strain PXO99. Arch Microbiol 191: 163–170.
- Zhang L, Zhu Z, Jing H, Zhang J, Xiong Y, et al. (2009) Pleiotropic effects of the twin-arginine translocation system on biofilm formation, colonization, and virulence in *Vibrio cholerae*. BMC Microbiol 9: 114.
- Rodriguez-Sanz M, Antunez-Lamas M, Rojas C, Lopez-Solanilla E, Palacios JM, et al. The Tat pathway of plant pathogen *Dickeya dadantii* 3937 contributes to virulence and fitness. FEMS Microbiol Lett 302: 151–158.
- van Mourik A, Bleumink-Pluym NM, van Dijk L, van Putten JP, Wosten MM (2008) Functional analysis of a *Campylobacter jejuni* alkaline phosphatase secreted via the Tat export machinery. Microbiology 154: 584–592.
- Ochsner UA, Snyder A, Vasil AI, Vasil ML (2002) Effects of the twin-arginine translocase on secretion of virulence factors, stress response, and pathogenesis. Proc Natl Acad Sci U S A 99: 8312–8317.
- Voulhoux R, Ball G, Ize B, Vasil ML, Lazdunski A, et al. (2001) Involvement of the twin-arginine translocation system in protein secretion via the type II pathway. EMBO J 20: 6735–6741.
- De Buck E, Maes L, Meyen E, Van Mellaert L, Geukens N, et al. (2005) *Legionella pneumophila* Philadelphia-1 *tatB* and *tatC* affect intracellular replication and biofilm formation. Biochem Biophys Res Commun 331: 1413–1420.
- Rossier O, Cianciotto NP (2005) The *Legionella pneumophila* *tatB* gene facilitates secretion of phospholipase C, growth under iron-limiting conditions, and intracellular infection. Infect Immun 73: 2020–2032.
- Caldelari I, Mann S, Crooks C, Palmer T (2006) The Tat pathway of the plant pathogen *Pseudomonas syringae* is required for optimal virulence. Mol Plant Microbe Interact 19: 200–212.
- Wagley S, Hemsley C, Thomas R, Moule MG, Vanaporn M, et al. (2014) The Twin Arginine Translocation System Is Essential for Aerobic Growth and Full Virulence of *Burkholderia thailandensis*. J Bacteriol 196: 407–416.
- Lavander M, Ericsson SK, Broms JE, Forsberg A (2006) The twin arginine translocation system is essential for virulence of *Yersinia pseudotuberculosis*. Infect Immun 74: 1768–1776.

## Acknowledgments

We thank Kathy Kuehl for assistance with the EM samples, and Susan Welkos, Kei Amemiya and Jennifer Dankmeyer for providing the antibodies and recombinant proteins. Opinions, interpretations, conclusions, and recommendations are those of the authors and are not necessarily endorsed by the U.S. Army.

## Author Contributions

Conceived and designed the experiments: JB JK PW. Performed the experiments: JB CKC TTK AJ SM KM TB. Analyzed the data: JB TC SJK JK DF CGR TB. Wrote the paper: JB TB.



27. Doll JM, Zeitz PS, Etestad P, Bucholtz AL, Davis T, et al. (1994) Cat-transmitted fatal pneumonic plague in a person who traveled from Colorado to Arizona. *Am J Trop Med Hyg* 51: 109–114.
28. Surgalla MJ, Beesley ED (1969) Congo red-agar plating medium for detecting pigmentation in *Pasteurella pestis*. *Appl Microbiol* 18: 834–837.
29. Wang RF, Kushner SR (1991) Construction of versatile low-copy-number vectors for cloning, sequencing and gene expression in *Escherichia coli*. *Gene* 100: 195–199.
30. Donnenberg MS, Kaper JB (1991) Construction of an *eae* deletion mutant of enteropathogenic *Escherichia coli* by using a positive-selection suicide vector. *Infect Immun* 59: 4310–4317.
31. Bozue J, Mou S, Moody KL, Cote CK, Trevino S, et al. (2011) The role of the *phoPQ* operon in the pathogenesis of the fully virulent CO92 strain of *Yersinia pestis* and the IP32953 strain of *Yersinia pseudotuberculosis*. *Microb Pathog* 50: 314–321.
32. Conchas RF, Carniel E (1990) A highly efficient electroporation system for transformation of *Yersinia*. *Gene* 87: 133–137.
33. Hinchliffe SJ, Isherwood KE, Stabler RA, Prentice MB, Rakin A, et al. (2003) Application of DNA microarrays to study the evolutionary genomics of *Yersinia pestis* and *Yersinia pseudotuberculosis*. *Genome Res* 13: 2018–2029.
34. Anisimov AP, Bakhteeva IV, Panfirtsev EA, Svetoch TE, Kravchenko TB, et al. (2009) The subcutaneous inoculation of pH 6 antigen mutants of *Yersinia pestis* does not affect virulence and immune response in mice. *J Med Microbiol* 58: 26–36.
35. Fetherston JD, Schuetz P, Perry RD (1992) Loss of the pigmentation phenotype in *Yersinia pestis* is due to the spontaneous deletion of 102 kb of chromosomal DNA which is flanked by a repetitive element. *Mol Microbiol* 6: 2693–2704.
36. Fetherston JD, Perry RD (1994) The pigmentation locus of *Yersinia pestis* KIM6+ is flanked by an insertion sequence and includes the structural genes for pesticin sensitivity and HMWP2. *Mol Microbiol* 13: 697–708.
37. Buchrieser C, Brosch R, Bach S, Guiryole A, Carniel E (1998) The high-pathogenicity island of *Yersinia pseudotuberculosis* can be inserted into any of the three chromosomal *asn* tRNA genes. *Mol Microbiol* 30: 965–978.
38. Daly JA, Gooch WM, 3rd, Matsen JM (1985) Evaluation of the Wayson variation of a methylene blue staining procedure for the detection of microorganisms in cerebrospinal fluid. *J Clin Microbiol* 21: 919–921.
39. Anderson GW Jr, Worsham PL, Bolt CR, Andrews GP, Welkos SL, et al. (1997) Protection of mice from fatal bubonic and pneumonic plague by passive immunization with monoclonal antibodies against the F1 protein of *Yersinia pestis*. *Am J Trop Med Hyg* 56: 471–473.
40. Sun YC, Hinnebusch BJ, Darby C (2008) Experimental evidence for negative selection in the evolution of a *Yersinia pestis* pseudogene. *Proc Natl Acad Sci U S A* 105: 8097–8101.
41. DiMezzo TL, Ruthel G, Brueggemann EE, Hines HB, Ribot WJ, et al. (2009) In vitro intracellular trafficking of virulence antigen during infection by *Yersinia pestis*. *PLoS One* 4: e6281.
42. Glynn A, Roy CJ, Powell BS, Adamovic JJ, Freytag LC, et al. (2005) Protection against aerosolized *Yersinia pestis* challenge following homologous and heterologous prime-boost with recombinant plague antigens. *Infect Immun* 73: 5256–5261.
43. Worsham PL, Roy C (2003) Pestoides F, a *Yersinia pestis* strain lacking plasminogen activator, is virulent by the aerosol route. *Adv Exp Med Biol* 529: 129–131.
44. Davis KJ, Vogel P, Fritz DL, Steele KE, Pitt ML, et al. (1997) Bacterial filamentation of *Yersinia pestis* by beta-lactam antibiotics in experimentally infected mice. *Arch Pathol Lab Med* 121: 865–868.
45. Parkhill J, Wren BW, Thomson NR, Titball RW, Holden MT, et al. (2001) Genome sequence of *Yersinia pestis*, the causative agent of plague. *Nature* 413: 523–527.
46. Stanley NR, Findlay K, Berks BC, Palmer T (2001) *Escherichia coli* strains blocked in Tat-dependent protein export exhibit pleiotropic defects in the cell envelope. *J Bacteriol* 183: 139–144.
47. Benoit SL, Maier RJ (2014) Twin-Arginine Translocation System in *Helicobacter pylori*: TatC, but Not TatB, Is Essential for Viability. *MBio* 5.
48. Karlyshev AV, Galyov EE, Smirnov O, Guzayev AP, Abramov VM, et al. (1992) A new gene of the *f1* operon of *Y. pestis* involved in the capsule biogenesis. *FEBS Lett* 297: 77–80.
49. Chen TH, Elberg SS (1977) Scanning electron microscopic study of virulent *Yersinia pestis* and *Yersinia pseudotuberculosis* type 1. *Infect Immun* 15: 972–977.
50. Simpson WJ, Thomas RE, Schwan TG (1990) Recombinant capsular antigen (fraction 1) from *Yersinia pestis* induces a protective antibody response in BALB/c mice. *Am J Trop Med Hyg* 43: 389–396.
51. Mehig R, Braubaker RR (1993) Major stable peptides of *Yersinia pestis* synthesized during the low-calcium response. *Infect Immun* 61: 13–22.
52. Sarker MR, Neyt C, Stainier I, Cornelis GR (1998) The *Yersinia* Yop virulon: LcrV is required for extrusion of the translocators YopB and YopD. *J Bacteriol* 180: 1207–1214.
53. Sarker MR, Sory MP, Boyd AP, Iriarte M, Cornelis GR (1998) LcrG is required for efficient translocation of *Yersinia* Yop effector proteins into eukaryotic cells. *Infect Immun* 66: 2976–2979.
54. Pettersson J, Holmstrom A, Hill J, Leary S, Frithz-Lindsten E, et al. (1999) The V-antigen of *Yersinia* is surface exposed before target cell contact and involved in virulence protein translocation. *Mol Microbiol* 32: 961–976.
55. Welkos SL, Davis KM, Pitt LM, Worsham PL, Freidlander AM (1995) Studies on the contribution of the F1 capsule-associated plasmid pFra to the virulence of *Yersinia pestis*. *Contrib Microbiol Immunol* 13: 299–305.
56. Guarnier J, Shieh WJ, Greer PW, Gabastou JM, Chu M, et al. (2002) Immunohistochemical detection of *Yersinia pestis* in formalin-fixed, paraffin-embedded tissue. *Am J Clin Pathol* 117: 205–209.
57. Davis KJ, Fritz DL, Pitt ML, Welkos SL, Worsham PL, et al. (1996) Pathology of experimental pneumonic plague produced by fraction 1-positive and fraction 1-negative *Yersinia pestis* in African green monkeys (*Cercopithecus aethiops*). *Arch Pathol Lab Med* 120: 156–163.
58. Dilks K, Rose RW, Hartmann E, Pohlschroder M (2003) Prokaryotic utilization of the twin-arginine translocation pathway: a genomic survey. *J Bacteriol* 185: 1478–1483.
59. Ferrandez Y, Condemine G (2008) Novel mechanism of outer membrane targeting of proteins in Gram-negative bacteria. *Mol Microbiol* 69: 1349–1357.
60. Stanley NR, Palmer T, Berks BC (2000) The twin arginine consensus motif of Tat signal peptides is involved in Sec-independent protein targeting in *Escherichia coli*. *J Biol Chem* 275: 11591–11596.
61. Hinsley AP, Stanley NR, Palmer T, Berks BC (2001) A naturally occurring bacterial Tat signal peptide lacking one of the 'invariant' arginine residues of the consensus targeting motif. *FEBS Lett* 497: 45–49.
62. Bendtsen JD, Kiemer L, Fausboll A, Brunak S (2005) Non-classical protein secretion in bacteria. *BMC Microbiol* 5: 58.
63. Kato J, Nishimura Y, Yamada M, Suzuki H, Hirota Y (1988) Gene organization in the region containing a new gene involved in chromosome partition in *Escherichia coli*. *J Bacteriol* 170: 3967–3977.
64. Ding Z, Christie PJ (2003) *Agrobacterium tumefaciens* twin-arginine-dependent translocation is important for virulence, flagellation, and chemotaxis but not type IV secretion. *J Bacteriol* 185: 760–771.
65. He H, Wang Q, Sheng L, Liu Q, Zhang Y (2011) Functional characterization of *Vibrio alginolyticus* twin-arginine translocation system: its roles in biofilm formation, extracellular protease activity, and virulence towards fish. *Curr Microbiol* 62: 1193–1199.
66. Galyov EE, Karlyshev AV, Chernovskaya TV, Dolgikh DA, Smirnov O, et al. (1991) Expression of the envelope antigen F1 of *Yersinia pestis* is mediated by the product of *caf1M* gene having homology with the chaperone protein PapD of *Escherichia coli*. *FEBS Lett* 286: 79–82.
67. Runco LM, Myrczek S, Bliska JB, Thanassi DG (2008) Biogenesis of the fraction 1 capsule and analysis of the ultrastructure of *Yersinia pestis*. *J Bacteriol* 190: 3381–3385.
68. Felek S, Jeong JJ, Runco LM, Murray S, Thanassi DG, et al. (2011) Contributions of chaperone/usher systems to cell binding, biofilm formation and *Yersinia pestis* virulence. *Microbiology* 157: 805–818.
69. Welkos S, Pitt ML, Martinez M, Friedlander A, Vogel P, et al. (2002) Determination of the virulence of the pigmentation-deficient and pigmentation-/plasminogen activator-deficient strains of *Yersinia pestis* in non-human primate and mouse models of pneumonic plague. *Vaccine* 20: 2206–2214.
70. Hallett AF, Isaacson M, Meyer KF (1973) Pathogenicity and immunogenic efficacy of a live attenuated plague vaccine in vervet monkeys. *Infect Immun* 8: 876–881.
71. Cathelyn JS, Crosby SD, Latham WW, Goldmann WE, Miller VL (2006) RovA, a global regulator of *Yersinia pestis*, specifically required for bubonic plague. *Proc Natl Acad Sci U S A* 103: 13514–13519.
72. Friedlander AM, Welkos SL, Worsham PL, Andrews GP, Heath DG, et al. (1995) Relationship between virulence and immunity as revealed in recent studies of the F1 capsule of *Yersinia pestis*. *Clin Infect Dis* 21 Suppl 2: S178–181.
73. Welkos SL, Friedlander AM, Davis KJ (1997) Studies on the role of plasminogen activator in systemic infection by virulent *Yersinia pestis* strain CO92. *Microb Pathog* 23: 211–223.
74. Latham WW, Price PA, Miller VL, Goldman WE (2007) A plasminogen-activating protease specifically controls the development of primary pneumonic plague. *Science* 315: 509–513.
75. Latham WW, Crosby SD, Miller VL, Goldman WE (2005) Progression of primary pneumonic plague: a mouse model of infection, pathology, and bacterial transcriptional activity. *Proc Natl Acad Sci U S A* 102: 17786–17791.
76. Fisher ML, Castillo C, Mecsas J (2007) Intranasal inoculation of mice with *Yersinia pseudotuberculosis* causes a lethal lung infection that is dependent on *Yersinia* outer proteins and PhoP. *Infect Immun* 75: 429–442.
77. Weening EH, Cathelyn JS, Kaufman G, Lawrenz MB, Price P, et al. (2011) The dependence of the *Yersinia pestis* capsule on pathogenesis is influenced by the mouse background. *Infect Immun* 79: 644–652.
78. Anderson DM, Ciletti NA, Lec-Lewis H, Elli D, Segal J, et al. (2009) Pneumonic plague pathogenesis and immunity in Brown Norway rats. *Am J Pathol* 174: 910–921.
79. Price SB, Cowan C, Perry RD, Straley SC (1991) The *Yersinia pestis* V antigen is a regulatory protein necessary for Ca<sup>2+</sup>(+)-dependent growth and maximal expression of low-Ca<sup>2+</sup> response virulence genes. *J Bacteriol* 173: 2649–2657.
80. Warawa JM (2010) Evaluation of surrogate animal models of melioidosis. *Front Microbiol* 1: 141.
81. Glomski JJ, Dumetz F, Jouvion G, Huerre MR, Mock M, et al. (2008) Inhaled non-capsulated *Bacillus anthracis* in A/J mice: nasopharynx and alveolar space as dual portals of entry, delayed dissemination, and specific organ targeting. *Microbes Infect* 10: 1398–1404.

82. Swedin L, Ellis R, Kemi C, Ryrfeldt A, Inman M, et al. (2010) Comparison of aerosol and intranasal challenge in a mouse model of allergic airway inflammation and hyperresponsiveness. *Int Arch Allergy Immunol* 153: 249–258.
83. Anderson GW Jr, Leary SE, Williamson ED, Titball RW, Welkos SL, et al. (1996) Recombinant V antigen protects mice against pneumonic and bubonic plague caused by F1-capsule-positive and -negative strains of *Yersinia pestis*. *Infect Immun* 64: 4580–4585.
84. Worsham PL, Stein MP, Welkos SL (1995) Construction of defined F1 negative mutants of virulent *Yersinia pestis*. *Contrib Microbiol Immunol* 13: 325–328.
85. Quence LE, Cornelius CA, Ciletti NA, Elli D, Schneewind O (2008) *Yersinia pestis cafI* variants and the limits of plague vaccine protection. *Infect Immun* 76: 2025–2036.
86. Cornelius CA, Quence LE, Elli D, Ciletti NA, Schneewind O (2009) *Yersinia pestis IS1541* transposition provides for escape from plague immunity. *Infect Immun* 77: 1807–1816.
87. Drozdov IG, Anisimov AP, SamoiloVA SV, Yezhov IN, Yeremin SA, et al. (1995) Virulent non-capsulate *Yersinia pestis* variants constructed by insertion mutagenesis. *J Med Microbiol* 42: 264–268.
88. Sebbane F, Jarrett C, Gardner D, Long D, Hinnebusch BJ (2009) The *Yersinia pestis cafIMIAI* fimbrial capsule operon promotes transmission by flea bite in a mouse model of bubonic plague. *Infect Immun* 77: 1222–1229.
89. Berks BC, Sargent F, Palmer T (2000) The Tat protein export pathway. *Mol Microbiol* 35: 260–274.
90. Kolkman MA, van der Ploeg R, Bertels M, van Dijk M, van der Laan J, et al. (2008) The twin-arginine signal peptide of *Bacillus subtilis* YwbN can direct either Tat- or Sec-dependent secretion of different cargo proteins: secretion of active subtilisin via the *B. subtilis* Tat pathway. *Appl Environ Microbiol* 74: 7507–7513.
91. Kostecki JS, Li H, Turner RJ, DeLisa MP (2010) Visualizing interactions along the *Escherichia coli* twin-arginine translocation pathway using protein fragment complementation. *PLoS One* 5: e9225.
92. Deghmane AE, Giorgini D, Larribe M, Alonso JM, Taha MK (2002) Down-regulation of pili and capsule of *Neisseria meningitidis* upon contact with epithelial cells is mediated by CrgA regulatory protein. *Mol Microbiol* 43: 1555–1564.
93. Koskiniemi S, Sellin M, Norgren M (1998) Identification of two genes, *cpsX* and *cpsY*, with putative regulatory function on capsule expression in group B streptococci. *FEMS Immunol Med Microbiol* 21: 159–168.
94. Hennequin C, Forestier C (2009) *oxyR*, a LysR-type regulator involved in *Klebsiella pneumoniae* mucosal and abiotic colonization. *Infect Immun* 77: 5449–5457.
